1 Multi-Method Molecular Characterisation of Human Dust-Mite-associated Allergic  
2 Asthma

3  
4 E. Whittle<sup>1</sup>, M.O. Leonard<sup>2</sup>, T.W. Gant<sup>2</sup> and D.P Tonge<sup>1</sup>

5  
6 <sup>1</sup>School of Life Sciences, Faculty of Natural Sciences, Keele University, ST5 5BG

7 <sup>2</sup>Centre for Radiation, Chemical and Environmental Hazards, Public Health  
8 England, OX11 0RQ

9

10 **Abstract**

11 Asthma is a chronic inflammatory disorder of the airways. Disease presentation  
12 varies greatly in terms of cause, development, severity, and response to medication,  
13 and thus the condition has been subdivided into a number of asthma phenotypes.  
14 There is still an unmet need for the identification of phenotype-specific markers and  
15 accompanying molecular tools that facilitate the classification of asthma phenotype.  
16 To this end, we utilised a range of molecular tools to characterise a well-defined  
17 group of adults with poorly controlled asthma associated with house dust mite (HDM)  
18 allergy, relative to non-asthmatic control subjects. Circulating messenger RNA  
19 (mRNA) and microRNA (miRNA) were sequenced and quantified, and a differential  
20 expression analysis of the two RNA populations performed to determine how gene  
21 expression and regulation varied in the disease state. Further, a number of  
22 circulating proteins (*IL-4*, *5*, *10*, *17A*, *Eotaxin*, *GM-CSF*, *IFN $\gamma$* , *MCP-1*, *TARC*, *TNF $\alpha$* ,  
23 *Total IgE*, and *Endotoxin*) were quantified to determine whether the protein profiles  
24 differed significantly dependent on disease state. Finally, assessment of the  
25 circulating “blood microbiome” was performed using 16S rRNA amplification and  
26 sequencing. Asthmatic subjects displayed a range of significant alterations to  
27 circulating gene expression and regulation, relative to healthy control subjects, that  
28 may influence systemic immune activity. Notably, several circulating mRNAs were  
29 detected in the plasma in a condition-specific manner, and many more were found to  
30 be expressed at altered levels. Proteomic analysis revealed increased levels of  
31 inflammatory proteins within the serum, and decreased levels of the bacterial  
32 endotoxin protein in the asthma state. Comparison of blood microbiome composition  
33 revealed a significant increase in the Firmicutes phylum with asthma that was  
34 associated with a concomitant reduction in the Proteobacteria phylum. This study  
35 provides a valuable insight into the systemic changes evident in the HDM-associated  
36 asthma, identifies a range of molecules that are present in the circulation in a  
37 condition-specific manner (with clear biomarker potential), and highlights a range of  
38 hypotheses for further study.

39

## 40 Introduction

41

42 Asthma is a chronic inflammatory disorder of the airways and is a global public  
43 health concern due to increasing prevalence and mortality rates (1–4). The World  
44 Health Organisation has estimated that 300 million people are living with asthma,  
45 and that 250,000 individuals die prematurely each year as a result of the disease (5).

46 Asthma can develop during childhood (early-onset) or in adulthood (late-onset) and  
47 is characterised by chronic inflammation of the airways and intermittent episodes of  
48 reversible airway obstruction (6,7). Over time, chronic inflammation of the airways  
49 results in airway hyper-responsiveness and structural changes, including airway  
50 fibrosis, goblet cell hyperplasia, increased smooth muscle mass, and increased  
51 angiogenesis (7,8).

52 The causes of asthma are multifactorial, and include a complex variety of  
53 environmental, immunological, and host genetic factors (7,9–13). Disease typically  
54 occurs in genetically predisposed individuals (13,14), and clinical presentation is  
55 highly heterogenous (15). Disease can vary greatly in terms of disease onset and  
56 response to treatment (16). It can present as a chronic, stable disease, but also as  
57 intermittent asthma exacerbations that can be fatal (17). Symptoms can be mild or  
58 severe and arise as a result of a multitude of factors, including immunoglobulin-E  
59 (IgE) mediated allergic responses, exposure to pollutants, exercise, stress, or airway  
60 infections (17).

61 The complex nature of asthma pathogenesis has resulted in speculation as to  
62 whether asthma is a single disease, or a spectrum of related diseases with subtle but  
63 distinct differences in aetiology and pathophysiology (18,19). This has led to asthma  
64 being separated into a number of phenotypes, which are then further subdivided into  
65 several endotypes (6,15,18–20). These asthma phenotypes are triggered by  
66 complex gene-environment interactions and respond differently to the various  
67 asthma medications available. Individuals with eosinophilic asthma, for instance,  
68 have been reported to have a good therapeutic response to inhaled or oral  
69 corticosteroid therapy, whereas individuals with neutrophilic asthma have been found  
70 to respond poorly to this therapeutic approach (21).

71 Diagnostic tools for identifying the various asthma phenotypes are limited, and thus  
72 optimal treatment protocols are not being utilised in a number of patients. Moreover,  
73 despite decades of research, there has been little progress in the development of  
74 treatments since the introduction of inhaled  $\beta_2$  adrenoceptor 2 selective agonists  
75 (1969) and inhaled glucocorticosteroids (1974) (15). Long-term use of these  
76 medications has been associated with a number of health concerns (22), including  
77 the stunting of growth in children (23), cataract development (24,25), osteoporosis  
78 (26,27), and cardiovascular events (28). Overall, an estimated 5-10% of asthmatics  
79 fail to respond to conventional medications (29). In order to improve patient response  
80 to treatment, and / or assist in the development of new therapeutics, an improved  
81 knowledge of the molecular mechanisms that underlie the various asthma  
82 phenotypes is required. Long-term, this may also facilitate the targeted use of  
83 conventional asthma therapies, and facilitate the development of new medications

84 aligned to the individual asthmatic phenotypes, subsequently reducing asthma  
85 mortality and improving quality of life.

86

87 The focus of this study was to characterise, at the molecular level, a small but well-  
88 defined cohort of patients with atopic asthma associated with house dust mite (HDM)  
89 allergy. Global estimates suggest that 1-2% of the world's population are sensitive  
90 to HDM (30), as are approximately 50% of asthmatic patients (30,31). HDM  
91 sensitivity has been linked to increased asthma severity (32) and almost one-third of  
92 patients with HDM sensitivity are unresponsive to current asthma therapies (33).  
93 Increasing our understanding of this specific asthma phenotype is therefore crucial.  
94 To this end we performed a comprehensive molecular characterisation of (1)  
95 circulating mRNAs, (2) circulating microRNAs, (3) circulating protein-based markers  
96 of the immune response and (4) integrated these data with our previous work  
97 characterising evidence of a circulating microbiome.

98

99

100

101 **Methods**

102 **Donor Population**

103 Atopic asthmatic individuals (n=5) with physician-diagnosed HDM allergy, and  
104 gender and age-matched healthy control subjects (n=5) were recruited to the study  
105 via SeraLabs Limited. Asthma patients were selected on the basis that they had  
106 developed atopic asthma during early childhood and that their condition had  
107 continued into adulthood and remained “poorly controlled”. A full list of recruitment  
108 criteria is presented in **(Table 1)**.

109 Whole blood was drawn, following alcohol cleansing of the skin surface, into EDTA  
110 containing tubes and stored on ice prior to centrifugation at 1000×g to obtain the  
111 plasma component. All samples were analysed anonymously, and the authors  
112 obtained ethical approval and written informed consent to utilise the samples for the  
113 research reported herein.

114 The Independent Investigational Review Board Inc. ethically approved sample  
115 collection by Sera Laboratories Limited from human donors giving informed written  
116 consent. Furthermore, the authors obtained ethical approval from Keele University  
117 Ethical Review Panel 3 for the study reported herein. All experiments were  
118 performed in accordance with relevant guidelines and regulations.

119

120 **Table 1:** Donor population characteristics required for the study

121

**Patient Criteria**

- Have a BMI < 30
- Be a non-smoker
- Have been diagnosed with atopic asthma during childhood
- Have severe/ poorly controlled asthma
- Must not be on any oral steroid treatment
- Must be allergic to the house dust mite
- Must not have diabetes, COPD, or hypertension

## 122 **Analysis of Inflammatory proteins**

123 Plasma levels of interleukin (IL)-4, IL-5, IL-10, IL-13, IL-17A, IFN $\gamma$ , TARC, Eotaxin,  
124 GM-CSF, MCP-1, RANTES, and TNF $\alpha$ , was determined using a qualitative enzyme-  
125 linked immunosorbent assay (ELISA) custom designed for this study. Two multi-  
126 analyte sandwich ELISAs (Qiagen) were used, and analysis of the inflammatory  
127 proteins was achieved using the recommended Multi-Analyte ELISArray kit protocol  
128 (QIAGEN). Statistical analysis was performed by carrying out a Shapiro-Wilk  
129 normality test and a Wilcoxon rank sum test using *R* software Version 3.5.0.

130

## 131 **Quantitative analysis of total IgE**

132 The concentration of total immunoglobulin E (IgE) was determined using sandwich  
133 ELISA (Genesis Diagnostics Ltd). The ELISA was performed in duplicate using the  
134 recommended protocol, and absorbance was measured at 450nm using an ELX800  
135 absorbance reader (BioTek). Statistical analysis was performed by carrying out a  
136 Shapiro-Wilk normality test and an unpaired T test using *R* software Version 3.5.0.

137

## 138 **Quantitative analysis of endotoxin concentration**

139 Circulating bacterial endotoxin concentration was measured using a Pierce<sup>TM</sup>  
140 Limulus Amebocyte Lysate (LAL) Chromogenic Endotoxin quantitative kit (Thermo  
141 Scientific). The assay was performed in triplicate using the recommended protocol,  
142 and absorbance was measured at 450nm using an ELX800 Absorbance reader  
143 (BioTek). Statistical analysis was performed by carrying out a Shapiro-Wilk normality  
144 test and an unpaired T test using *R* software Version 3.5.0.

145

## 146 **Total RNA extraction**

147 Total RNA was extracted from 500 $\mu$ l of human plasma using the Qiagen serum and  
148 plasma miRNeasy kit. The quantity and quality of the RNA extracts was determined  
149 using the QuBit fluorimeter (Invitrogen) and BioAnalyzer (Agilent).

150

## 151 **Library Preparation and Next Generation Sequencing**

152 Messenger RNA (mRNA) sequencing libraries were prepared using the SMARTer  
153 Universal Low Input RNA kit, and sequenced (Illumina HiSeq 2000) with a paired-  
154 end 90 nucleotide read metric. Small RNA sequencing libraries were prepared using  
155 the TruSeq small RNA library kit (Illumina), and sequencing was conducted on the  
156 Illumina HiSeq 2000 platform.

157 Raw sequencing data were trimmed of sequencing adaptors and low-quality reads  
158 removed using the Trim Galore package – a wrapper that incorporates CutAdapt and  
159 FastQC. For whole transcriptome analysis, quality-controlled reads were aligned to  
160 the Human Genome build hg19 using TopHat, a splice-junction aware mapping utility

161 necessary for the successful mapping of intron-spanning (multi-exon) transcripts.  
162 Transcriptome assembly was performed using CuffLinks and a merged transcript  
163 representation of all samples produced using CuffMerge. Transcripts expressed at  
164 significantly different levels between the asthma and control samples were identified  
165 using CuffDiff, with a Q value  $\leq 0.05$  considered significant (34). MicroRNA (miRNA)  
166 analysis was performed by mapping miRNA reads to miRbase Version 21 using  
167 sRNAtoolbox (35). Differential expression of the miRNA reads was determined  
168 following statistical analysis with edgeR for R (36).

169

## 170 **Biological Pathway Analysis**

171 Biological functions of the mRNA and miRNA that were differentially expressed  
172 between asthma and control subjects (defined as  $Q \leq 0.05$  in the mRNA dataset; and  
173  $FDR \leq 0.05$  in the miRNA dataset) were determined using Ingenuity Pathway  
174 analysis (IPA) software.

175 Networks of genes comprising known biological processes were identified using IPA.  
176 Causal inference analysis was then applied to determine upstream regulators that  
177 may explain the pattern of differential expression seen. Casual inference analysis  
178 involved the generation of an enrichment score (Fisher's exact test  $P$  value) and a Z  
179 score to determine the possible upstream biological causes of the differential gene  
180 expression observed in the asthmatic subjects (37). The enrichment score measured  
181 the overlap of observed and predicted regulated gene sets, whilst the Z score  
182 assessed the match of observed and predicted up/ down regulation patterns (37).  
183 Putative regulators that scored an overlap  $P$  value  $\leq 0.05$  were deemed statistically  
184 significant, and the Z scores were used to determine the activity of the putative  
185 regulators (an upstream regulator with a Z score greater than 2.0 was considered  
186 activated, whilst an upstream regulator with a Z score less than -2.0 was considered  
187 deactivated). Causal inference analysis was also used to predict the downstream  
188 effects the differentially expressed genes and miRNA could have on biological  
189 processes and functions in the asthmatic subjects.

190

## 191 **Circulating microbiome analysis**

192 We have previously reported evidence of a circulating microbiome in the blood of  
193 both asthmatic and healthy patients (38) using oligonucleotide primers reported in  
194 (Supplementary Materials, S1). Here, we re-analysed this data with the aim of  
195 identifying organisms that were differentially present or abundant dependent on  
196 disease status. The QIIME pipeline was used for quality filtering of DNA sequences,  
197 demultiplexing, and taxonomic assignment. Alpha diversity was determined by  
198 calculating Shannon and Chao1 diversity indices. Differences in relative abundance  
199 was calculated by performing Shapiro-Wilk normality tests and the appropriate  
200 statistical test (unpaired T tests when the samples displayed gaussian distribution  
201 and Wilcox rank sum test when the samples did not display Gaussian distribution) on  
202 bacterial abundance data (read counts normalised to the total number of bacterial  
203 reads per patient) using R software Version 3.5.0.

204 In addition to standard statistical tests, the linear discriminant analysis effect size  
205 (LefSe) method was used to identify the bacterial taxa most likely to explain the  
206 differences in microbial populations present in the asthmatic cohort compared to the  
207 control cohort. In brief, the non-parametric factorial Kruskal-Wallis sum-rank test was  
208 applied to the 16S relative abundance data in order to detect features with significant  
209 differential abundance in the asthmatic cohort compared to the control group. A set  
210 of pairwise tests among subclasses using the unpaired Wilcoxon rank-sum test were  
211 then carried out to assess whether the detected differences in relative abundance  
212 were consistent with respect to biological behaviour. Linear discriminant analysis  
213 (LDA) was then performed to predict the effect of each identified differentially  
214 abundant bacterial taxa.

215

216



217 **Results**

218 **Patient Recruitment and Characterisation**

219 Five female asthmatic subjects were recruited in accordance with the inclusion  
 220 criteria detailed in (**Table 1**). The mean age of the asthmatic subjects was  $39.6 \pm$   
 221  $11.7$  years, and all had been clinically diagnosed with atopic asthma during early  
 222 childhood (mean age of onset =  $6.2 \pm 3.2$  years) (**Table 2**). At the time of sample  
 223 collection, the asthmatic subjects were on prophylactic therapy to minimise the  
 224 occurrence of disease symptoms (see Supplemental Material, S2). Asthma severity  
 225 was determined using the internationally recognised Asthma Control Questionnaire  
 226 (ACQ) (39,40), and all the asthmatic subjects scored a total  $\geq 10.0$  (mean total score  
 227 =  $10.8 \pm 0.75$ ) (see Supplemental Material, S2). Additionally, three of the asthmatic  
 228 subjects were clinically diagnosed with other atopic diseases, including allergic  
 229 rhinitis, allergic dermatitis, and nasal polyps (see Supplemental Material, S2).

230 Five non-asthmatic females with a mean BMI of  $24.3 \pm 2.1$  were recruited to the  
 231 study as healthy controls. The control subjects had never smoked and had a mean  
 232 age of  $39.4 \pm 10.3$  years (**Table 2**). Two of the controls, Control\_2 and Control\_3,  
 233 reported self-diagnosed dermatitis, although neither had received diagnosis by a  
 234 physician for this condition.

235

236 **Table 2:** Characterisation of the asthmatic (n = 5) and control subjects (n = 5) at the  
 237 time of sample collection. S.D. = standard deviation

238

| Characteristic                        | Allergic Asthmatics | Non-Asthmatics |
|---------------------------------------|---------------------|----------------|
| <b>Demographic characteristics</b>    |                     |                |
| <b>Age - yr</b>                       |                     |                |
| Mean (S.D)                            | 39.6 (11.7)         | 39.4 (10.3)    |
| Range                                 | 19 - 52             | 23 - 49        |
| <b>Race or ethnic group – no. (%)</b> |                     |                |
| Caucasian                             | 2 (40)              | 2 (40)         |
| Hispanic                              | 3 (60)              | 3 (60)         |
| <b>Sex – no. (%)</b>                  |                     |                |
| Female                                | 5 (100)             | 5 (100)        |
| Male                                  | 0 (0)               | 0 (0)          |
| <b>Smoking History</b>                |                     |                |
| <b>Smoking Status – no (%)</b>        |                     |                |
| Never Smoked                          | 5 (100)             | 5 (100)        |
| Former Smoker                         | 0 (0)               | 0 (0)          |
| Smoker                                | 0 (0)               | 0 (0)          |
| <b>BMI</b>                            |                     |                |
| Mean (S.D)                            | 24.4 (2.6)          | 24.3 (2.1)     |
| Range                                 | 21.5 – 27.8         | 21 – 26.4      |



## 239 **Inflammatory proteins**

240 To determine the immune status of the asthmatic patients at the time of sample  
241 collection, characterisation of various chemokines and cytokines associated with  
242 asthma pathology was performed.

243 Qualitative ELISA was performed on the blood samples in order to profile the  
244 inflammatory state of the asthmatic and control, and inflammatory proteins under  
245 investigation included interleukin (IL)-4, IL-5, IL-10, IL-13, IL-17A, eotaxin,  
246 granulocyte-macrophage colony-stimulating factor (GM-CSF), interferon gamma  
247 (IFN $\gamma$ ), monocyte chemoattractant protein 1 (MCP-1), thymus and activation  
248 regulated chemokine (TARC), and tumour necrosis factor alpha (TNFA). Additionally,  
249 the concentration of the pro-inflammatory bacterial endotoxin protein was measured,  
250 and total IgE present in the blood was quantified to determine the atopic state of the  
251 asthmatic subjects.

252 With regards to the host-derived inflammatory proteins, 10 out of the 12 inflammatory  
253 proteins under investigation were detected in the blood samples (see Supplementary  
254 Materials, S3).

255 Overall the asthmatic subjects were found to have elevated levels of inflammatory  
256 proteins compared to the controls, as determined by increased levels of all  
257 inflammatory proteins examined. This was particularly apparent for chemokines  
258 TARC (Fold change = 4.173; P value = 0.095), GM-CSF (Fold change = 3.607; P  
259 value = 0.111), and IFN $\gamma$  (Fold change = 20.871; P value = 0.195) (**Figure 1A, B,**  
260 **and C**). However, it should be noted that there were no statistically significant  
261 increases detected for any of the individual proteins. This was likely due to the  
262 asthmatic subjects having a greater level of diversity with regards to inflammatory  
263 protein levels compared to the control subjects (**Figure 1**).

264 Of interest was the levels of IL-17A observed. This protein whilst not significantly  
265 increased in the asthmatic subjects (P value = 0.413), was found to be present at  
266 higher levels in asthmatic subjects who suffered additional atopic complications  
267 (Asthma\_1, Asthma\_2, and Asthma\_4) and the two control subjects who had self-  
268 reported atopic dermatitis (Control\_2 and Control\_3) (see Supplementary Material  
269 S2 and S3). This suggests that whilst systemic levels of this cytokine are not  
270 elevated in asthma, IL-17A levels may be elevated in the blood of individuals with  
271 other atopic conditions, such as allergic rhinitis and atopic dermatitis.

272 Moreover, the asthmatic cohort appeared divided with regards to the inflammatory  
273 protein profiles, whereby asthmatic subjects Asthma\_2 and Asthma\_4 typically had  
274 high levels of circulatory inflammatory proteins, whilst asthmatic subjects Asthma\_1,  
275 Asthma\_3 and Asthma\_5 displayed protein levels similar to those observed for the  
276 control subjects. This is reflective of the heterogenous nature of asthma pathology  
277 and suggests that possibility of asthma sub-phenotypes that display varying levels of  
278 circulatory inflammatory proteins. We comment upon this heterogeneity, and the  
279 impact of this upon sample size selection in the concluding section.

280 Total IgE was detected in 50% of the blood samples under investigation (three  
281 control subjects and two asthmatic subjects (**Figure 1D**).

282 For the purpose of statistical analysis, samples with undetectable levels of IgE were  
283 given an IgE concentration value of 0. Comparison between the concentrations of  
284 IgE detected in the asthmatic samples compared to the control samples revealed no  
285 significant differences. This is likely due to the small number of samples with  
286 detectable IgE. However, samples Asthma\_2 and Asthma\_4 again had notably  
287 higher levels than the rest of the sample set. Within the asthmatic cohort it was these  
288 two subjects that had the highest levels of inflammatory proteins under investigation  
289 (see Supplementary Materials, S3), and thus the results of IgE quantification further  
290 support the concept of asthma sub-phenotypes with different circulatory immune  
291 status. As noted previously, such hypotheses require investigation with a much  
292 larger study cohort.

293 Overall, endotoxin levels were found to be reduced in the asthmatic subjects (**Figure**  
294 **1E**; P value = 0.0650). Within the asthma cohort, subjects with additional atopic  
295 complications (i.e. allergic rhinitis, allergic dermatitis) displayed lower endotoxin  
296 concentrations compared to the asthmatic subjects that did not have additional  
297 atopic complications. This finding was further supported by the observation that  
298 within the control cohort, subjects with previously reported atopic dermatitis  
299 displayed circulatory endotoxin concentrations similar (i.e. lower than those subjects  
300 reporting no atopic conditions) to those observed in the asthma cohort.

301

302

303

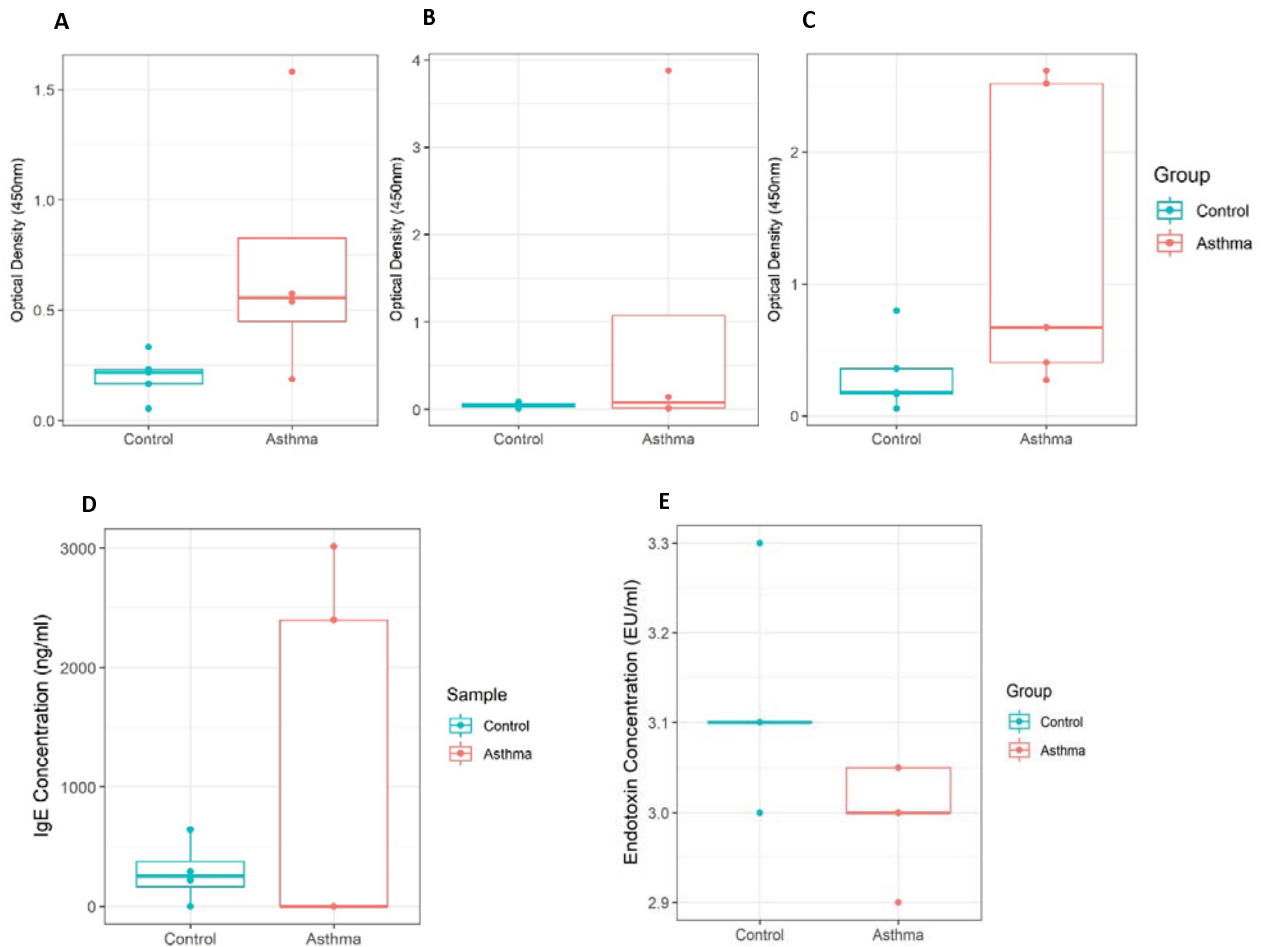

304

305 **Figure 1: Analysis of circulatory inflammatory proteins present in blood**  
306 **samples from control subjects (n = 5) and asthma subjects (n = 5). A = levels of**  
307 **GM-CSF present in the blood of asthmatic subjects (n = 5) and control subjects (n =**  
308 **5) using qualitative ELISA analysis, P value = 0.111 (Wilcoxon rank sum test with**  
309 **continuity correction); B = levels of IFN $\gamma$  present in the blood of asthmatic subjects**  
310 **(n = 5) and control subjects (n = 5) using qualitative ELISA analysis, P value = 0.195**  
311 **(Wilcoxon rank sum test with continuity correction); C = levels of TARC in the blood**  
312 **using of asthmatic subjects (n = 5) and control subjects (n = 5) qualitative ELISA**  
313 **analysis, P value = 0.095 (Wilcoxon rank sum test with continuity correction); D =**  
314 **Concentrations of total IgE protein present in the blood of asthmatic subjects (n = 4)**  
315 **and control subjects (n = 5) using quantitative ELISA analysis, P value = 1.0**  
316 **(Wilcoxon rank sum test with continuity correction); E = Concentrations of bacterial**  
317 **endotoxin present in the blood of asthmatic subjects (n = 5) and control subjects (n =**  
318 **5) using Limulus Amebocyte Lysate (LAL) Chromogenic quantification. P value =**  
319 **0.0650 (unpaired T test). EU/ml = endotoxin units per millilitre. Data points at 3.1**  
320 **EU/ml for control = 3; Data points at 3.0 EU/ml for asthma = 2; Data points at 3.05**  
321 **EU/ml for asthma = 2.**

## 322 **mRNA Sequencing and Differential Expression Analysis**

323 Approximately 20,000,000 messenger RNA (mRNA) read pairs were generated from  
324 each plasma sample (average 44,000,000  $\pm$  3,100,000 reads), with no significant  
325 differences in read count identified between the two cohorts.

326 Expression of a total of 14, 226 genes was detected through assessment of the  
327 circulating transcriptome (i.e. those RNAs present in the plasma). Given the nature  
328 of our sample type, the extent of read mapping to key mRNAs was confirmed  
329 visually by appraising the resulting BAM file against hg19 using IGV (data not  
330 shown). Sample Asthma\_2 failed to map satisfactorily to hg19 and was thus  
331 excluded due to concerns this would induce bias into our downstream analyses.  
332 Statistical analysis, as detailed previously, revealed 287 genes were differentially  
333 expressed in the asthmatic subjects (as defined by a  $Q \leq 0.05$  and a Log2 Fold  
334 Change  $> 0.6$ ). Within the asthmatic cohort, 90 of the differentially expressed genes  
335 showed significantly increased expression, and 197 genes displayed significantly  
336 decreased expression. Genes that displayed the highest degree of differential  
337 expression within the asthmatic subjects are listed in **Table 3**. A full list of  
338 differentially expressed genes can be viewed in the supplementary materials  
339 (Supplementary Materials, S4)

340

341

342 **Table 3: Genes that were most differentially expressed in the asthmatic**  
 343 **subjects (n = 4) compared to the control subjects (n = 5).** Where genes are  
 344 expressed in a condition-specific manner, Log2 fold change is replaced with “Control  
 345 Only” or “Asthma Only” as appropriate. Quantity of the gene is shown as Fragments  
 346 Per Kilobase of transcript per Million mapped (FPKM) reads

| Gene                       | Control Mean | Asthma Mean | Fold Change (log2) | Q Value  |
|----------------------------|--------------|-------------|--------------------|----------|
| <b>Downregulated Genes</b> |              |             |                    |          |
| DOHH                       | 972.908      | 0           | Control Only       | 0.002975 |
| PTRH2                      | 87.7907      | 0           | Control Only       | 0.002975 |
| C15orf41                   | 79.1979      | 0           | Control Only       | 0.002975 |
| HIST1H3I                   | 30.2331      | 0           | Control Only       | 0.002975 |
| HOXC10                     | 26.4924      | 0           | Control Only       | 0.002975 |
| TSPYL5                     | 18.9517      | 0           | Control Only       | 0.002975 |
| NFXL1                      | 17.8423      | 0           | Control Only       | 0.002975 |
| RAB3IL1                    | 15.1233      | 0           | Control Only       | 0.002975 |
| LINC00085                  | 15.0233      | 0           | Control Only       | 0.002975 |
| ARV1                       | 14.0641      | 0           | Control Only       | 0.002975 |
| <b>Upregulated Genes</b>   |              |             |                    |          |
| HIST1H3C                   | 0            | 90.5782     | Asthma Only        | 0.002975 |
| HDAC9                      | 0.731644     | 52.1632     | 6.15575            | 0.005217 |
| PRAM1                      | 0            | 3.05743     | Asthma Only        | 0.005217 |
| PML                        | 0.948462     | 178.238     | 7.554              | 0.007164 |
| RAB6B                      | 0            | 8.90346     | Asthma Only        | 0.007164 |
| NRP1                       | 0.92425      | 18.8945     | 4.35354            | 0.010799 |
| CD93                       | 0            | 14.3366     | Asthma Only        | 0.010799 |
| GPR56                      | 1.86976      | 98.5377     | 5.71975            | 0.012559 |
| MR1                        | 1.07632      | 17.8916     | 4.0551             | 0.017952 |
| TOP1MT                     | 0.344555     | 59.0342     | 7.42067            | 0.017952 |

347

348 Interestingly, there were numerous genes that were expressed in a condition specific  
 349 manner (96 genes were uniquely expressed in the control subjects, and 64 genes  
 350 were uniquely expressed in the asthmatic subjects). To determine whether the  
 351 asthmatic subjects had a distinct gene expression profile compared to the control  
 352 subjects, genes that displayed robust levels of expression (as determined by a mean  
 353 LOG2 FPKM score  $\geq 6.0$ ) were plotted as a heatmap and unsupervised cluster  
 354 analysis was performed using Euclidean distance (**Figure 2**).

355

356

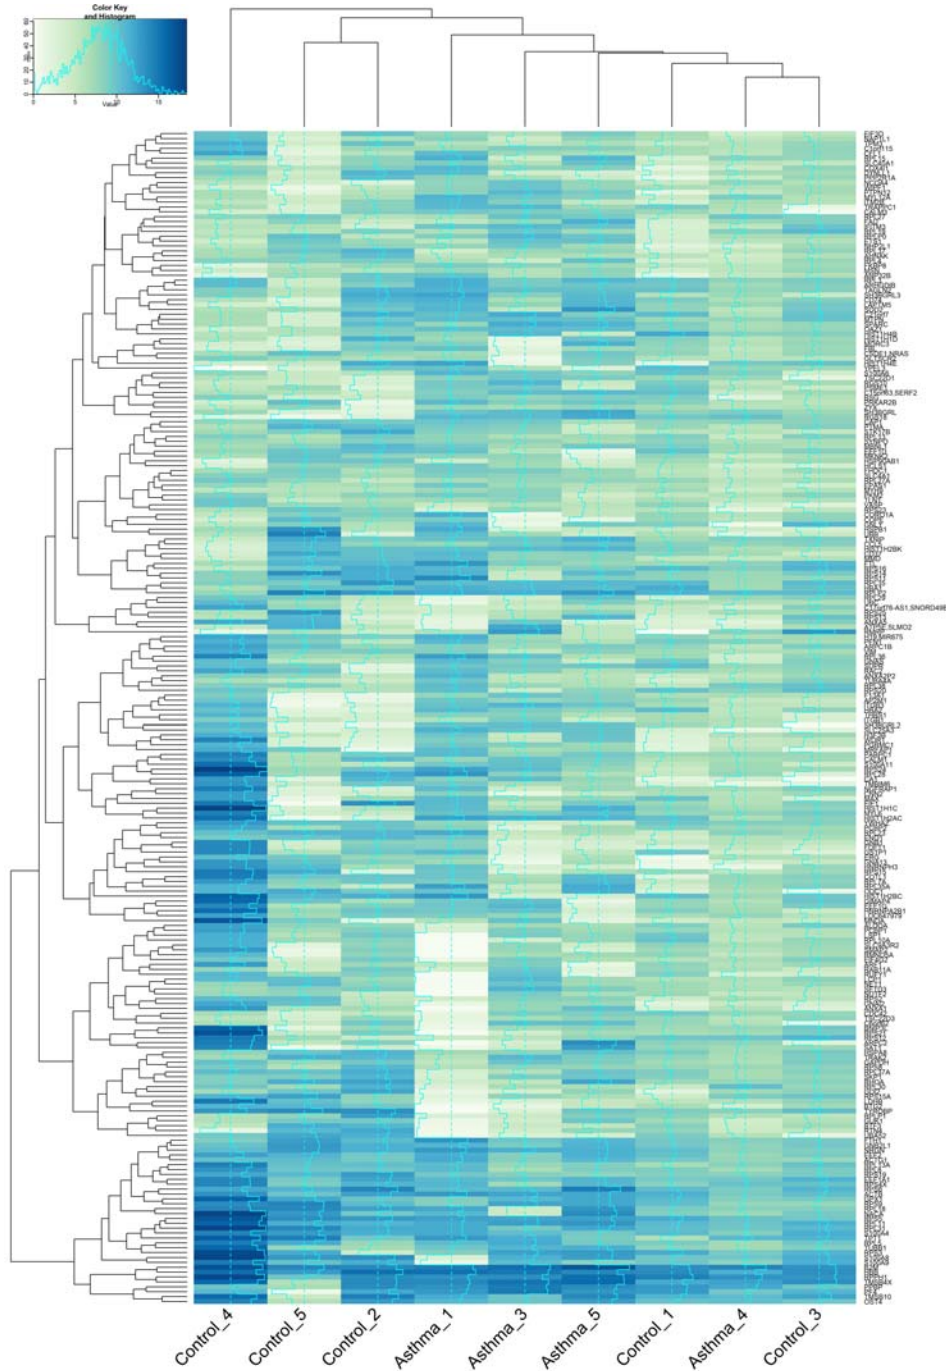

357

358

359 **Figure 2: Heatmap showing highly expressed genes in control subjects (n = 5)**

360 **and asthma subjects (n = 4).** Gene expression is determined by quantification of

361 circulatory mRNA present in the plasma samples and is expressed as log<sub>2</sub>

362 normalised Fragments Per Kilobase of transcript per Million mapped (FPKM) reads.

363 Highly expressed genes, as determined by a mean log<sub>2</sub> FPKM score  $\geq 6.0$  are



364 plotted, and Cluster analysis (Euclidean distance) informs the X and Y-axis  
365 dendrograms.

366 Cluster analysis revealed that subject Control\_4 had a relatively unique mRNA  
367 profile. For the remaining subjects, two clusters formed on the basis of circulatory  
368 mRNA populations. Cluster 1 was formed of Control\_5 and Control\_2; and Cluster 2  
369 was comprised of Asthma\_1, Asthma\_3, Asthma\_5, Control\_1, Asthma\_4, and  
370 Control\_3. The dominance of asthmatic subjects in Cluster 2 suggests the possibility  
371 of a distinct asthma mRNA profile that would likely be more apparent in a larger  
372 sample group. Of interest, Asthma\_4 clustered more closely with control Subjects  
373 Control\_1 and Control\_3. This asthmatic subject was the youngest member of the  
374 asthma cohort, with an age of 19 years, and the subject had been suffering from  
375 asthma for just 14 years compared to the mean length of 38 years that our other  
376 subjects had been living with the disease. It is tempting to speculate that asthmatic  
377 mRNA profiles become more divergent from control profiles as the disease  
378 progresses over time, however our sample size restricts further analysis of this.

379 The diversity of genes being expressed within the circulatory system was assessed  
380 using principal coordinate analysis (PCA) (**Figure 3**).

381



382

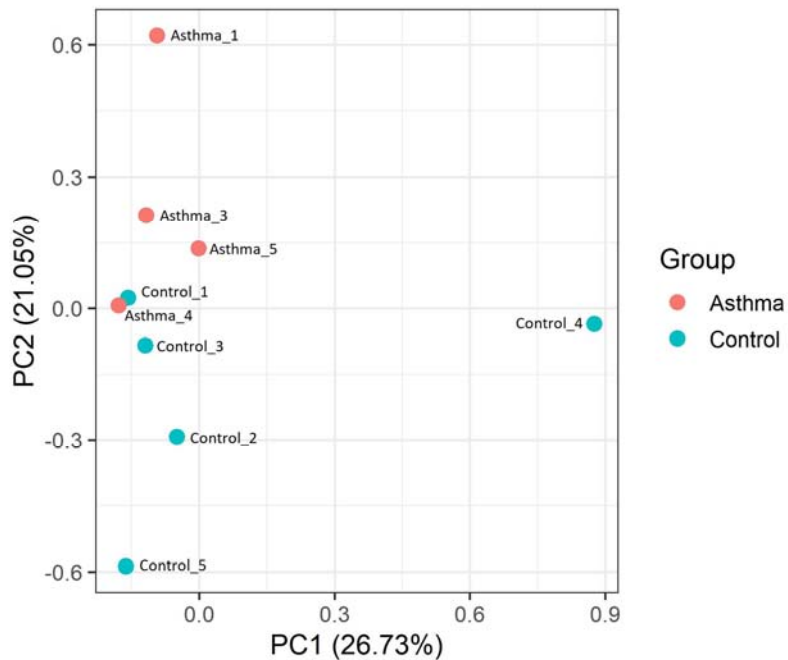

383

384 **Figure 3: Principal component analysis ordination of Bray Curtis dissimilarity**  
385 **between circulatory mRNA populations present in control subjects (n = 5) and**  
386 **asthma subjects (n = 4).** Principal component analysis was performed on a gene  
387 population dataset using quantitative mRNA Fragments Per Kilobase of transcript  
388 per Million mapped (FPKM) reads that had been normalised using log2. Only genes  
389 with mean FPKM scores  $\geq 6.0$  were included in the dataset, and the principal  
390 coordinate analysis was performed using Bray Curtis dissimilarity and R software.  
391 Blue data points = Control; Orange datasets = Asthma

392

393

394

395

396

397 Examination of Bray Curtis dissimilarity between the subjects found that,  
398 unsurprisingly, samples clustered similarly to that observed using unsupervised  
399 clustering (Euclidean distance). PCA analysis, did however reveal that the control  
400 and asthmatic subjects were differentiated on the basis of principal component (PC)  
401 2, whereby asthmatic subjects had a positive PC2 score and control subjects had a  
402 negative PC2 score. Moreover, Asthma\_4 clustered with the control subjects, thus  
403 providing additional evidence that this subject has a mRNA profile similar to the  
404 control subjects.

405

406 To determine whether differential gene expression could be linked to asthma  
407 pathology, we compared the differentially expressed genes identified herein, to a  
408 recently released database of genes associated with asthma pathology - AllerGAtlas,  
409 2018 (41). Of the 287 genes identified as being significantly differentially expressed  
410 in the asthmatic subjects, 8 genes were identified in the asthma gene database.  
411 These genes included complement regulatory protein 46 (CD46), interleukin 7  
412 receptor (IL7R), galactin 3(LGALS3), myeloperoxidase (MPO), neurotensin (NTS),  
413 phosphodiesterase 4A (PDE4A), toll-like receptor (TLR) 1, and vitamin D receptor  
414 (VDR). Four of the genes were upregulated in the asthmatic subjects (VDR, NTS,  
415 TLR1, and MPO) and four were downregulated in the asthmatic subjects (LGAL3,  
416 CD46, IL7R, and PDE4A) (**Table 4**). Moreover, gene expression was predominately  
417 condition specific. Of the upregulated genes, NTS, TLR1, and MPO mRNA was only  
418 detectable in the asthma samples, whilst in the downregulated genes, IL7R and  
419 PDE4R mRNA was only observed in the control samples (see Supplementary  
420 Materials, S4).

421

422 **Table 4: Genes with significant differential expression in the asthmatic**  
 423 **subjects compared to control subjects that are associated with asthma**  
 424 **pathology.** Differential gene expression was determined using the Tuxedo protocol  
 425 (Galaxy software) on log2 normalised mRNA Fragments Per Kilobase of transcript  
 426 per Million mapped (FPKM) reads sequenced from plasma samples from asthma  
 427 subjects (n = 4) and control subjects (n = 5). Gene function with regards to asthma  
 428 pathology was determined using the asthma database AllerGAtlas, 2018 (41) and a  
 429 general literature search using the relevant search engines.

430

| Gene   | Expression in Asthma | Function                                                              | Reference    |
|--------|----------------------|-----------------------------------------------------------------------|--------------|
| CD46   | Downregulated        | Differentiation of IL-10 producing regulatory T cell type 1 cells     | (42)(43)     |
|        |                      | Differentiation of Th1 cells                                          | (44)(45)     |
|        |                      | Inhibition of HDM allergenic activity                                 | (46)         |
| IL7R   | Downregulated        | Marker for Treg activation                                            | (47)         |
|        |                      | T cell development                                                    |              |
|        |                      | Eosinophil survival                                                   | (48)         |
| LGALS3 | Downregulated        | Inhibition of IL-5 expression                                         | (49)         |
|        |                      | Inhibition of eosinophil and T cell infiltration                      | (49)         |
|        |                      | Negative regulation of Th17 polarization                              | (50)         |
| MPO    | Upregulated          | Initiation of lipid peroxidation                                      | (51)         |
| NTS    | Upregulated          | Mast cell degranulation                                               | (52)(53)     |
| PDE4A  | Downregulated        | Production of CD4+ T cell cytokines (IL-2, IL-4, IL-5, IFN $\gamma$ ) | (54)(55)(56) |
|        |                      | Production of TNF $\alpha$                                            | (54)         |
|        |                      | Production of leukotriene B4                                          | (54)         |
|        |                      | Production of eotaxin                                                 | (56)         |
|        |                      | Airway goblet cell hyperplasia                                        | (56)         |
| TLR1   | Upregulated          | Antimicrobial activity                                                | (57)(58)(59) |
| VDR    | Upregulated          | Development of airway inflammation and hyperresponsiveness            | (60)         |
|        |                      | Eosinophilia                                                          | (60)         |
|        |                      | Inhibits IgE production                                               | (60)(61)     |

431

432

433 The genes identified in the asthma gene database (41) were found to influence a  
434 number of key components of asthma pathology, including eosinophil and T cell  
435 migration, production of Th2 cytokines (IL-4, IL-5, and IL-13), mast cell  
436 degranulation, IgE production, and airway hyperresponsiveness. Moreover, several  
437 of the downregulated genes (CD46, IL7R), have been found to have roles in Treg  
438 differentiation and activation. These cells are important regulators of T cell activity  
439 (62–65) , and thus downregulation of CD46 and IL7R suggests loss of control of T  
440 cell activity in the asthmatic subjects.

441

442

#### 443 **miRNA Quantification**

444 Approximately 10,000,000 micro RNA (miRNA) reads were generated from each  
445 plasma sample (range = 10,276,765 - 16,812,591, mean = 12,030,581  $\pm$  1,911,104),  
446 and there were no significant differences in read count identified between the control  
447 and asthma samples.

448 Using miRanalyzer (35) and edgeR (36), we identified 166 known miRNAs present  
449 in the plasma samples (**Figure 4**), which is consistent with previously reported  
450 studies (66–70). To determine whether the asthmatic subjects had distinct miRNA  
451 profiles compared to the control subjects, miRNA expression was plotted as a  
452 heatmap, and unsupervised clustering was performed using Euclidean distance  
453 (**Figure 4**).

454

455

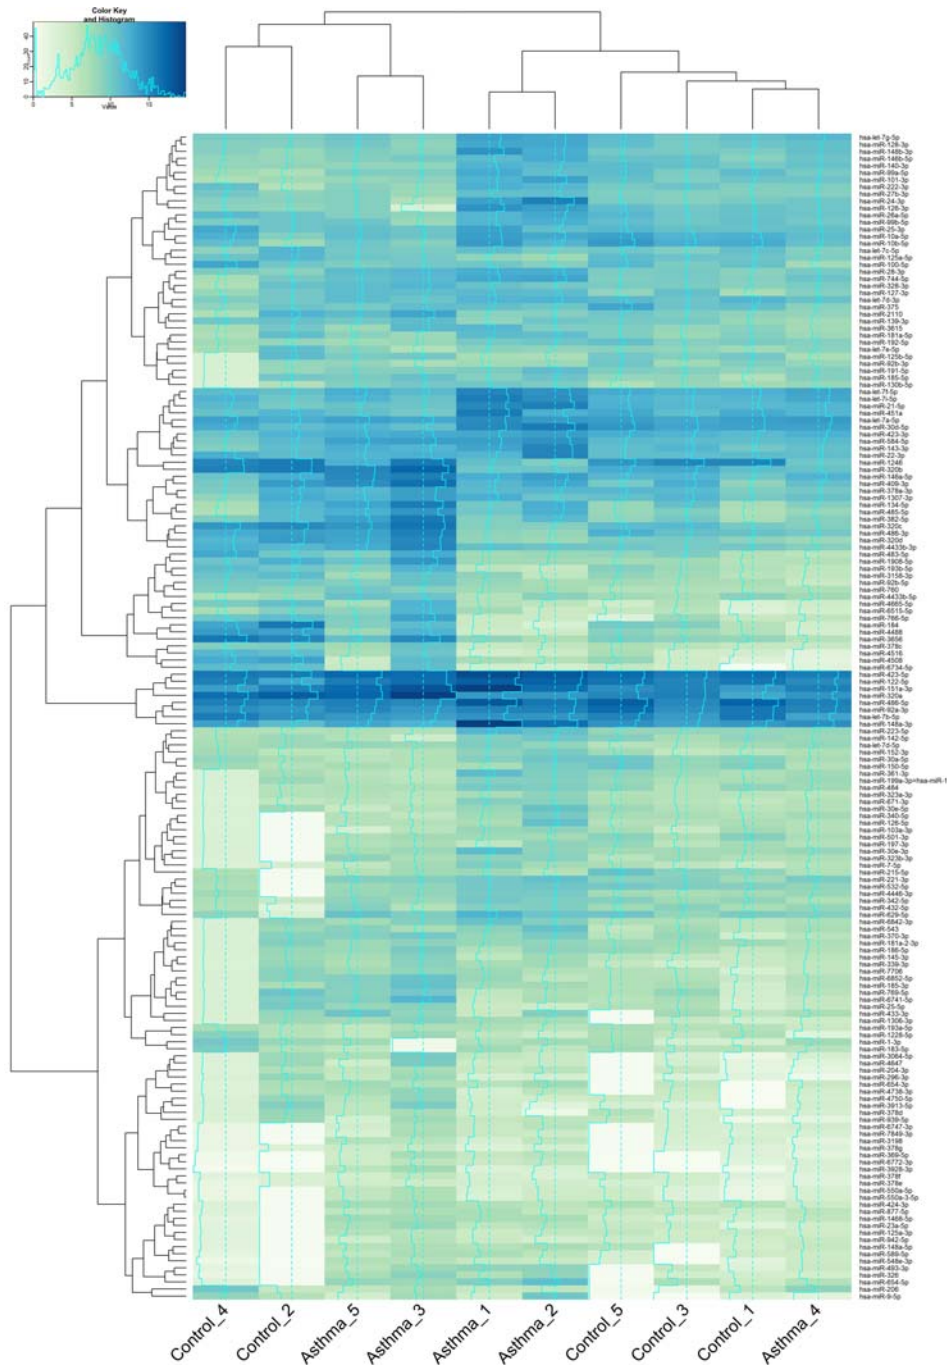

456

457 **Figure 4. A Heatmap showing expression levels of circulatory miRNA in**  
458 **control subjects (n = 5) and asthmatic subjects (n = 5). miRNA expression is**  
459 **determined by quantification of circulatory miRNA detected in the plasma samples**  
460 **and is expressed as log<sub>2</sub> normalised Counts per Million mapped (CPM) reads.**  
461 **Cluster analysis (Euclidean distance) informs the X and Y-axis dendrograms**

462

463

464 Analysis of miRNA expression revealed the presence of two clusters with regards to  
465 the miRNA populations present within the plasma. Cluster 1 was composed  
466 Control\_4, Control\_2, Asthma\_5, and Asthma\_3; and Cluster 2 was made up of  
467 Asthma\_1, Asthma\_2, Control\_5, Control\_3, Control\_1, and Asthma\_4. Within each  
468 cluster two sub-clusters formed, and each sub-cluster was formed of either control  
469 subjects or asthma subjects. The one exception was Asthma\_4, which clustered with  
470 other control subjects.

471 Of interest, the two asthma sub-clusters that formed appeared to be governed by the  
472 presence or absence of additional atopic complications. Asthma\_5 and Asthma\_3  
473 clustered together and both subjects were free of additional atopic complication,  
474 whereas Asthma\_1 and Asthma\_2 clustered together, and both subjects had  
475 additional atopic complications such as allergic rhinitis. As we have noted previously,  
476 further study using a larger asthma cohort would be required to determine this  
477 association given the clear heterogeneity noted.

478 Statistical analysis revealed that 13 miRNAs were differentially expressed (defined  
479 as FDR P value  $\leq 0.05$  and a fold change  $\geq 2.0$ ) in the asthmatic subjects compared  
480 to the control subjects (**Figure 5**, see also Supplementary Materials S5). As  
481 predicted, Asthma\_4 displayed miRNA levels similar to those observed in the control  
482 subjects. As stated previously, Asthma\_4 was the youngest of the asthmatic subjects  
483 and had been living with the disease for the shortest period of time. It is tempting to  
484 speculate that asthmatic miRNA profiles become more divergent from control  
485 subjects as the disease progresses over time, and that this in turn alters gene  
486 expression.

487

488

489

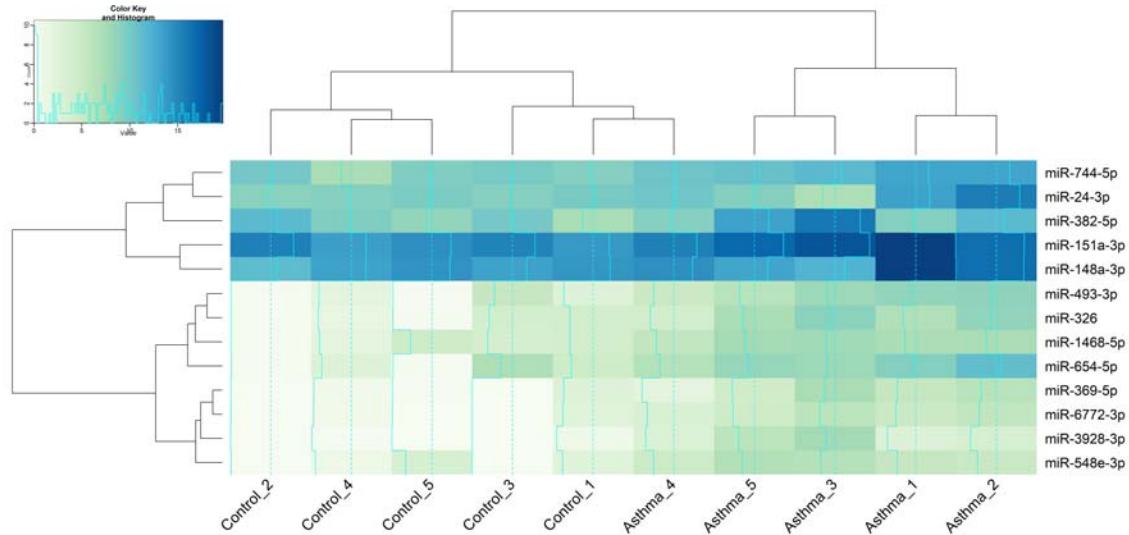

490

491

492 **Figure 5: A heatmap showing expression levels of circulatory miRNA that**  
493 **displayed significant differential expression in asthmatic subjects (n = 5)**  
494 **compared to control subjects (n = 5).** miRNA expression was determined by  
495 quantification of circulatory miRNA detected in the plasma samples and is expressed  
496 as log<sub>2</sub> normalised Fragments Per Kilobase of transcript per Million mapped (FPKM)  
497 reads. Differential expression was determined using the edgeR program  
498 (Bioconductor software), and significant expression was defined as having a log fold  
499 change greater than 2.0 and a false rate of discovery (FDR) adjusted P value ≤ 0.05.  
500 Cluster analysis (Euclidean distance) informs the X and Y-axis dendrograms

501

502

503



504 **Functional Analysis**

505 Causal inference analysis using Ingenuity Pathway analysis (IPA) software was  
506 performed to identify the likely upstream regulators responsible for the changes in  
507 mRNA and miRNA expression noted in the asthmatic subjects.

508 In total, 246 upstream gene regulators had a P value of overlap  $\leq 0.05$ ; indicating  
509 that they have altered functional activity in the asthmatic subjects on the basis of  
510 differential mRNA and miRNA expression. Of these regulators, seven had Z scores  
511 greater than 2.0, thus enabling their activity to be predicted. Two upstream  
512 regulators were predicted to have significantly increased activity in the asthmatic  
513 subjects (P value of overlap  $\leq 0.05$ ; Z score  $\geq 2.0$ ), and five were predicted to have  
514 significantly decreased activity asthmatic subjects (P value of overlap  $\leq 0.05$ ; Z score  
515  $\leq -2.0$ ) in the (**Table 5**).

516

517

518 **Table 5: Upstream gene regulators with predicted significantly altered activity**  
519 **in the asthmatic subjects (n = 4) compared to the control subjects (n = 5).**  
520 Upstream regulators predicted to have significantly altered activity were defined as  
521 having a P value of overlap  $\leq 0.05$  and a Z score greater than 2.0. Activated  
522 upstream regulators are defined as having a Z score  $\geq 2.0$ , and inhibited upstream  
523 regulators are defined as having a Z score  $\leq -2.0$ . Target molecules activated =  
524 genes present in the RNA dataset that are activated by the upstream regulator;  
525 target molecules inhibited = genes present in the RNA dataset that are inhibited by  
526 the upstream regulator; target molecules affected = genes present in the RNA  
527 dataset whose activity is known to be altered by the upstream regulator but there is  
528 insufficient evidence to prove this is activation or inhibition.

529

| Upstream Regulator | Molecule type           | Activity state | Z score | P value of overlap | # Target molecules activated | # Target molecules inhibited | # Target molecules affected |
|--------------------|-------------------------|----------------|---------|--------------------|------------------------------|------------------------------|-----------------------------|
| Sirolimus          | Chemical drug           | Activated      | 2.75    | 0.0107             | 12                           | 1                            | 0                           |
| GFI1               | Transcription regulator | Activated      | 2.00    | 0.0077             | 4                            | 0                            | 1                           |
| EIF4E              | Transcription regulator | Inhibited      | -2.00   | 0.0074             | 0                            | 4                            | 2                           |
| Mycophenolic acid  | Chemical drug           | Inhibited      | -2.00   | 0.0211             | 0                            | 4                            | 0                           |
| Streptozocin       | Chemical drug           | Inhibited      | -2.16   | 0.0492             | 0                            | 5                            | 1                           |
| SOX4               | Transcription regulator | Inhibited      | -2.24   | 0.0770             | 0                            | 5                            | 0                           |
| SYVN1              | Transporter             | Inhibited      | -2.45   | 0.0069             | 0                            | 6                            | 0                           |

530

531

532 Of interest, with regards to atopic asthma pathology, was the predicted activated  
533 state of GFI1, a transcription regulator induced by T cell activation and IL-4/STAT6  
534 signalling. GFI1 is known to enhance Th2 expansion (71), and thus predicted  
535 activation of this transcription regulator would suggest increased T cell activation and  
536 subsequent expansion of the Th2 cell populations within the asthmatic cohort. This  
537 notion is further supported by the prediction of significant inhibition of the upstream  
538 regulator SOX4 in the asthmatic cohort. This transcription factor has been observed  
539 to suppress Th2 differentiation (72), and thus its inhibition would allow expansion of  
540 the Th2 populations within the asthmatic subjects. The predicted activated state of  
541 GFI1 would also influence innate immune responses within the asthmatic cohort.  
542 The transcription factor has been found to have a role in the development and  
543 maintenance of type 2 innate lymphoid cells (73); a cell population that has been  
544 found to be involved in allergic lung inflammation (74–76).

545 However, it should be noted causal inference analysis was performed on mRNA  
546 detected in the blood, and thus the cellular origins of the gene expression observed  
547 is unknown. Further study would be required to determine if GFI1 was indeed  
548 activated and SOX4 was inhibited in the relevant body sites and or relevant *in vitro*  
549 models of asthma pathology.

550

### 551 **Downstream Activity**

552 Causal inference analysis using IPA was also used to predict the downstream  
553 consequences of the observed differential mRNA and miRNA expression within the  
554 asthmatic subjects. The downstream effects of the differential expression were  
555 primarily assessed by examination of the predicted canonical pathways and bio-  
556 functions impacted.

557

### 558 **Canonical pathway analysis**

559 Fourteen canonical pathways were found to have significantly altered biological  
560 activity ( $P \leq 0.05$ ) within the asthmatic subjects (**Table 6**). In line with the findings of  
561 the upstream analysis, a number of canonical pathways involved in T cell and B cell  
562 activity, including signalling in rheumatoid arthritis, B cell development, and Nur77  
563 signalling. It is interesting to note the canonical pathways involved in rheumatoid  
564 arthritis and Type 1 diabetes were identified, as both diseases have been found to  
565 display co-occurrence with asthma (77,78). It is tempting to speculate about the  
566 existence of similar / shared underlying immune pathologies in the three diseases.

567

568

569 **Table 6: Canonical signalling pathways predicted to have significantly altered**  
 570 **activity in the asthmatic subjects (n = 4) compared to the control subjects (n =**  
 571 **5).** Casual interference using Ingenuity Pathway Analysis (IPA) software was used to  
 572 predict downstream canonical signalling pathways likely to be affected by changes in  
 573 gene expression and regulation in the asthmatic subjects. Molecules with increased  
 574 gene expression are genes that had significantly increased numbers of mRNA reads  
 575 in the asthma plasma samples, and molecules with decreased gene expression are  
 576 genes that had significantly decreased numbers of mRNA reads in the asthma  
 577 plasma samples. Canonical pathways that are defined as being significantly altered  
 578 in the asthma subjects have a P value  $\leq 0.05$ .

579

| Canonical Pathway                                            | P Value | Molecules with increased gene expression | Molecules with decreased gene expression |
|--------------------------------------------------------------|---------|------------------------------------------|------------------------------------------|
| Altered T Cell and B Cell Signalling in Rheumatoid Arthritis | 0.0053  | SLAMF1, TLR1, HLA-DQA1, TNFRSF13C        | HLA-DRB5                                 |
| B Cell Development                                           | 0.0092  | HLA-DQA1                                 | IL7R, HLA-DRB5                           |
| Antigen Presentation Pathway                                 | 0.0116  | HLA-DQA1, MR1                            | HLA-DRB5                                 |
| Melatonin Degradation III                                    | 0.0124  | MPO                                      | -                                        |
| TNFR1 Signalling                                             | 0.0241  | -                                        | TRADD, IKKKB, PAK4                       |
| Acute Myeloid Leukemia Signalling                            | 0.0287  | PML                                      | CSF2RB, CEBPA, IDH3B                     |
| Tetrahydrobiopterin Biosynthesis I                           | 0.0368  | -                                        | PTS                                      |
| Hypusine Biosynthesis                                        | 0.0368  | -                                        | DOHH                                     |
| Tetrahydrobiopterin Biosynthesis II                          | 0.0368  | -                                        | PTS                                      |
| Nur77 Signalling in T Lymphocytes                            | 0.0369  | HDAC9, HLA-DQA1                          | HLA-DRB5                                 |
| Phagosome Maturation                                         | 0.0375  | MPO, GOSR2                               | CTSL, CTSG, HLA-DRB5                     |
| Catecholamine Biosynthesis                                   | 0.0487  | -                                        | PNMT                                     |
| Mitotic Roles of Polo-Like Kinase                            | 0.0488  | STAG2                                    | ANAPC4, PPP2R5C                          |
| Type I Diabetes Mellitus Signalling                          | 0.0496  | HLA-DQA1                                 | TRADD, IKKKB, HLA-DRB5                   |

580

581

## 582 **Bio-function analysis**

583 With regards to biological functions likely to be impacted by changes in the observed  
 584 mRNA and miRNA expression patterns, a number of key immunological pathways  
 585 were predicted to have altered activity within the asthmatic cohort (Table 7).

586 Altered activity was defined as having a P value  $\leq 0.05$  and a Z score  $\geq 2.0$  or  $\leq -2.0$ ;  
 587 and in total 10 biological functions had significantly altered activity within the  
 588 asthmatic subjects (**Table 7**).

589

590 **Table 7: Biological functions predicted to have significantly altered activity in**  
591 **the asthmatic subjects (n = 4) compared to the control subjects (n = 5).** Casual  
592 inference using Ingenuity Pathway Analysis (IPA) software was used to predict  
593 biological functions likely to have altered activity in the asthmatic subjects. This was  
594 determined through analysis of genes and miRNA that had altered expression in the  
595 asthmatic subjects, to predict which biological functions would likely be altered.  
596 Biological functions predicted to be significantly altered in the asthmatic subjects  
597 were defined as having a P value  $\leq 0.05$  and a Z score greater than 2.0. Biological  
598 functions with predicted increased activity were defined as having a Z score  $\geq 2.0$ ,  
599 and biological functions with predicted decreased activity were defined as having a Z  
600 score  $\leq -2.0$

601

| Biological Functions                     | P Value  | Activation State | Z score |
|------------------------------------------|----------|------------------|---------|
| Binding of endothelial cells             | 9.75E-03 | Decreased        | -2.123  |
| Binding of leukocytes                    | 1.73E-03 | Decreased        | -2.062  |
| Cell transformation                      | 1.32E-03 | Decreased        | -3.228  |
| Differentiation of fibroblast cell lines | 4.44E-03 | Decreased        | -2.184  |
| Immune response of leukocytes            | 6.79E-04 | Decreased        | -2.031  |
| Interaction of endothelial cells         | 3.55E-03 | Decreased        | -2.346  |
| Killing of natural killer cells          | 5.44E-03 | Decreased        | -2.63   |
| Proliferation of hepatocytes             | 6.53E-03 | Increased        | 2.177   |
| Tumorigenesis of tissue                  | 4.94E-04 | Increased        | 2.215   |
| Viral infection                          | 1.34E-02 | Decreased        | -2.099  |

602

603 Unsurprisingly, leukocyte activity was identified as being decreased in the asthmatic  
604 cohort. However, at this level of analysis, the downstream effects on biological  
605 function of the different classes of leukocytes was not determined, and thus further  
606 study would be required to ascertain which leukocytes would likely have altered  
607 activity in the asthmatic subjects as a consequence of the differential mRNA and  
608 miRNA expression. Study of the specific leukocyte classes affected by asthma would  
609 be crucial, as inhibition of the Th1 or Treg lymphocytes would likely enhance asthma  
610 pathophysiology, whereas inhibition of the Th2 lymphocytes would likely alleviate  
611 asthma pathophysiology.

612 It was also of interest to observe the predicted decrease in killing of natural killer  
613 cells. This cell population has been previously identified as having a critical role in  
614 immune defence against viruses and bacteria (79–82). In particular, viral infections  
615 have been long characterised to exacerbate asthma (83–86), and asthmatics have  
616 been observed to be deficient in type I IFN production (87–89), which likely  
617 influences natural killer cell activity. Moreover, in a murine model, natural killer cell  
618 activity was found to be decreased during a Th2 response (90). This suggests that in  
619 asthmatic subjects, as a consequence of a Th2 biased immune system, there is  
620 reduced natural killer cell activity, resulting in the known associations with asthma

621 and respiratory infections. Moreover, this may also partially explain the changes in  
622 the airway microbiome we see in asthmatic populations.

623

## 624 Characterisation of the Blood Microbiota

### 625 Bacterial Relative Abundance

626 Our previous characterisation (38) of the bacterial RNA present in the plasma  
627 samples found that the majority of bacterial RNA belonged to the Proteobacteria  
628 phylum (Total relative abundance = 83.9%; Control mean = 90.0%; Asthma mean =  
629 80.3%), the Actinobacteria phylum (Total relative abundance = 7.5%, Control mean  
630 = 6.0%, Asthma mean = 7.5%), and the Firmicutes phylum (Total relative abundance  
631 = 6.6%, Control mean = 3.0%, Asthma mean = 9.0%) (**Figure 6**). Please refer to (38)  
632 for a detailed appraisal of our experimental controls.

633

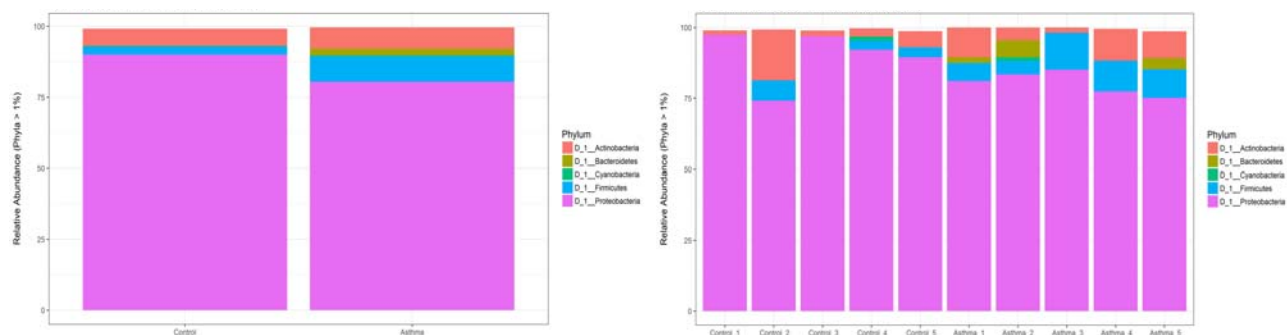

634

635 **Figure 6: Microbial profile of the blood microbiome at the phylum level in**  
636 **asthmatic subjects (n = 5) and control subjects (n = 5).** Composition of the blood  
637 microbiome was determined through sequencing of the bacterial V4 region of the  
638 16S rRNA gene from bacterial DNA isolated from plasma samples from control  
639 subjects (n = 5) and asthmatic subjects (n = 5). The generated bacterial sequences  
640 were clustered (99% identity) in Operational Taxonomic Units (OTUs) to the Silva  
641 database and then assigned to bacterial taxonomic classes. **A** = microbial profile of  
642 the asthmatic subjects (n = 5) compared to the control subjects (n = 5). **B** = Microbial  
643 profiles of the individual plasma samples (n = 10)

644

645 In the asthmatic samples, 16S amplification and sequencing revealed a significant  
646 increase in Firmicutes (P value = 0.0148), associated with a concomitant decrease in  
647 Proteobacteria (P value = 0.0702) (**Figure 6**). To a lesser extent, members of the  
648 Bacteroidetes phylum were also detected in the blood samples, with increased levels  
649 of Bacteroidetes observed in the asthmatic subjects (Control mean relative  
650 abundance = 0.26%, range = 0.0 – 2.7%; Asthma mean relative abundance =  
651 2.40%, range = 0 – 6.0%), although this was found to be non-significant increase (P  
652 value = 0.5258).

653

654

655



656 **Lefse Analysis**

657

658 Analysis of the phyla relative abundances detected in the blood was achieved using  
659 conventional statistical tests (unpaired *t* tests and Wilcox tests where appropriate)  
660 and suggested significant differences in the blood microbiome between control and  
661 asthma subjects. To test this, the linear discriminant analysis effect size (LefSe)  
662 method was applied to the 16S rRNA relative abundance data to determine the  
663 bacterial taxa most likely to explain the differences between the control and asthma  
664 blood microbiomes. LefSe was also used to determine the biological consistency and  
665 effect relevance of the observed differences in relative abundance.

666 In total, LefSe identified 8 bacterial taxa that showed statistically significant and  
667 biologically consistent differences in the asthmatic subjects compared to the control  
668 subjects (**Figure 7**). These findings were consistent with our previous analysis of the  
669 bacterial populations using standard statistical tests (data not shown). Six of the  
670 eight bacterial taxa displaying significant differences in relative abundance were  
671 increased in the asthmatic subjects, whilst 2 bacterial taxa were decreased. At the  
672 taxonomic class level, *Bacilli* were increased and *Bacteroidia* were decreased in the  
673 asthmatic subjects, whilst at the genus level both *Kocuria* and *Stenotrophomonas*  
674 were both increased in the asthmatic subjects.

675 The observed increases in Firmicutes were of particular interest as expansion of this  
676 phylum has been associated with severe asthma (21). Furthermore, increased levels  
677 of Firmicutes in the asthmatic subjects was predominately due to expansions of  
678 *Staphylococcus* and *Streptococcus* genera, both of which have been associated with  
679 the development of asthma during early childhood (91–94).

680 Additionally, our results were reflective of a previous study investigating the oral  
681 microbiome, whereby Firmicutes, *Stenotrophomonas*, and *Lactobacillus* were found  
682 to be increased in asthmatic subjects compared to the control subjects (95). This  
683 suggests that bacterial nucleic acid detected in the blood may have originated from  
684 the oral cavities, a theory that we consider in (38).

685

686

687 **Figure 7: Comparison of the healthy blood microbiome (n = 5) and the**  
 688 **asthmatic blood microbiome (n = 5) using LefSe.** Linear discriminant analysis  
 689 effect size (Lefse) analysis was performed on the bacterial taxa relative abundance  
 690 values to determine the presence of bacterial taxa with statistically significant  
 691 changes in abundance in the asthma blood microbiome compared to the control  
 692 blood microbiome. **A.** Taxonomic cladogram showing control enriched taxa (Green)  
 693 and asthma enriched taxa (Red). **B.** Effect size of the differential taxa. The control  
 694 enriched taxa are indicated with a positive LDA score, and the asthma enriched taxa  
 695 are indicated with a negative LDA score. The level of significance is indicated by the  
 696 P value shown for each taxa.

697

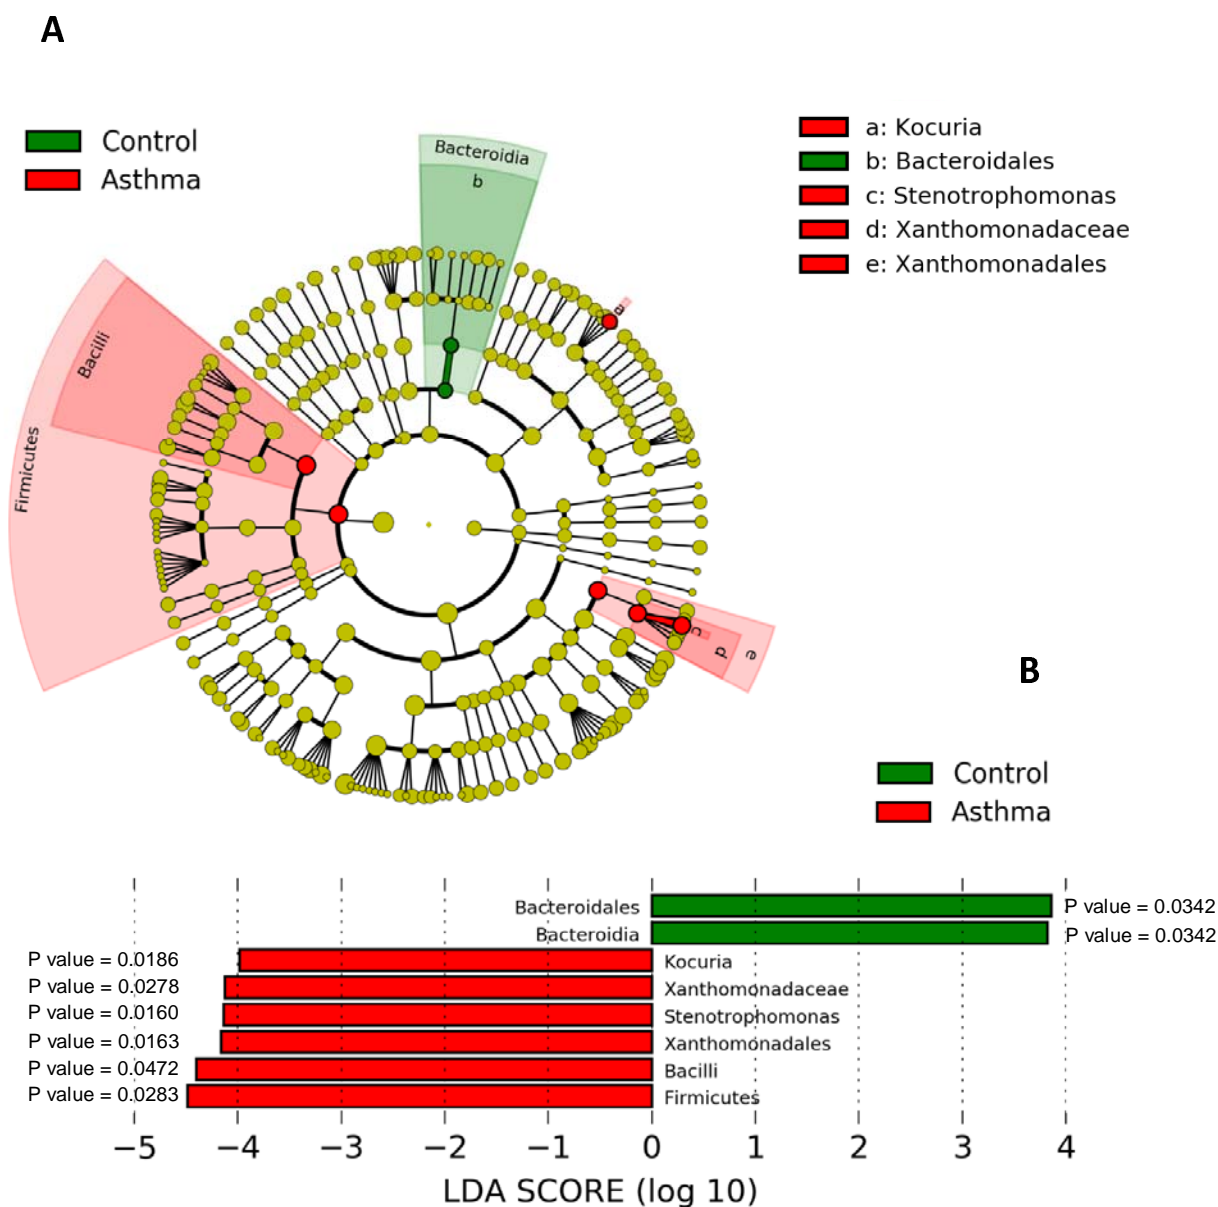

## 698 Bacterial Diversity

699 At the genus level, 81 bacterial genera were detected in the asthma plasma samples  
700 compared to 49 bacterial genera detected in the control plasma samples. Alpha and  
701 beta diversity of the bacterial populations present in the asthma and control groups  
702 was therefore assessed to determine whether there was significantly elevated  
703 bacterial diversity within the blood microbiome of the asthmatic subjects.

704

## 705 Alpha Diversity

706 Alpha diversity was determined by calculating the Chao1 index and Shannon index  
707 for each plasma sample. The control index scores were then compared to the  
708 asthma index scores to determine whether there were any significant differences  
709 between the two groups (Fig. 8).

710

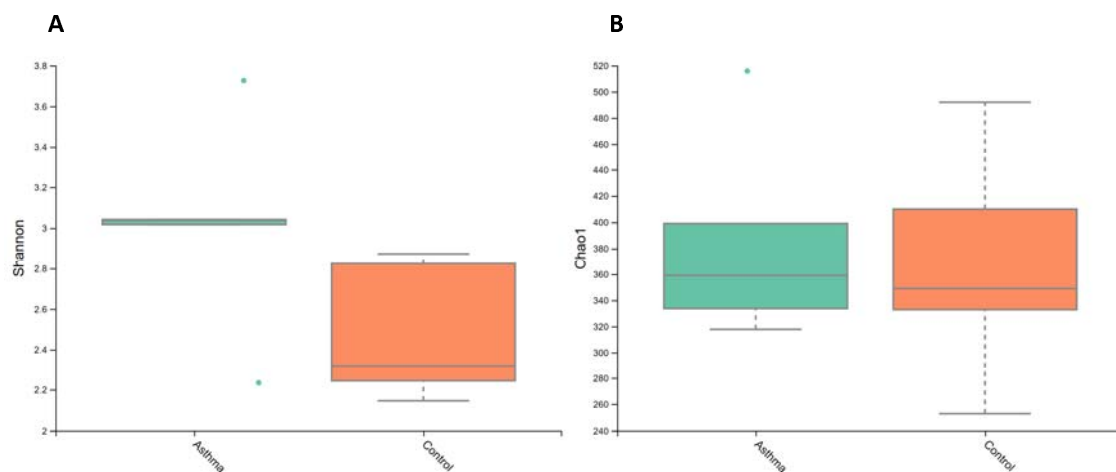

711

| Alpha Diversity | Control Mean (sd) | Asthma Mean (sd) | Fold Change | P value |
|-----------------|-------------------|------------------|-------------|---------|
| Shannon         | 3.58 (0.44)       | 4.34 (0.68)      | 1.2130      | 0.0710  |
| Chao1           | 378.90(58.12)     | 390.62 (62.44)   | 1.0309      | 0.7820  |

712

713 **Figure 8: Comparison of alpha diversity present in the asthma blood**  
714 **microbiome compared to the control blood microbiome.** Alpha diversity was  
715 measured using rarefied OTU tables generated from 16S rRNA sequencing data  
716 from plasma samples collected from asthma subjects (n = 5) and control subjects (n  
717 = 5). Shannon diversity index scores were generated from OTU tables in order to  
718 measure the richness of the plasma sample and evenness of bacterial taxa present  
719 in the sample. Chao1 index scores were measured to determine the predicted  
720 number of bacterial taxa present in the plasma samples by extrapolating out the  
721 number of rare organisms that may not have been detected due to under-sampling.  
722 **A** = Comparison of Shannon index scores generated from asthma plasma samples  
723 (n = 5) and control plasma samples (n = 5), **B** = Chao1 index scores generated from  
724 asthma plasma samples (n = 5) and control plasma samples (n = 5).

725 Comparison between the asthma and control cohorts revealed that the asthmatic  
726 subjects scored higher Chao1 and Shannon index scores than the control subjects,  
727 thus suggesting that asthma is associated with increased bacterial diversity (**Figure**  
728 **8**). This was particularly apparent for the Shannon diversity scores (P value =  
729 0.0710) (**Figure 8**). Intriguingly, one of the asthma subjects, Asthma\_3, displayed a  
730 Shannon diversity score more similar to the controls than the other asthmatic  
731 subjects. This subject developed asthma relatively late in childhood (age 12 years),  
732 and so it is possible that the age of asthma onset may influence the level of microbial  
733 diversity present in the blood. This is further supported by the high levels of alpha  
734 diversity present in the blood of Asthma\_5, an asthmatic subject who was diagnosed  
735 with asthma early on in childhood (3 years).

736

### 737 **Beta Diversity**

738

739 Beta diversity was calculated to determine how similar the blood samples were to  
740 one another with regards to bacterial diversity. This enabled not only comparison  
741 between the asthma and control subjects, but also between the different members  
742 within each group.

743 Beta diversity was determined by performing principal coordinate component (PCoA)  
744 analysis using weighted UniFrac distances (**Figure 9**). PCoA analysis found that  
745 beta diversity was principally a consequence of PCo1 variation (37.1%), and overall  
746 the asthmatic subjects had higher PCo1 values with regards to beta diversity within  
747 the blood microbiome compared to the control subjects.

748

749

750

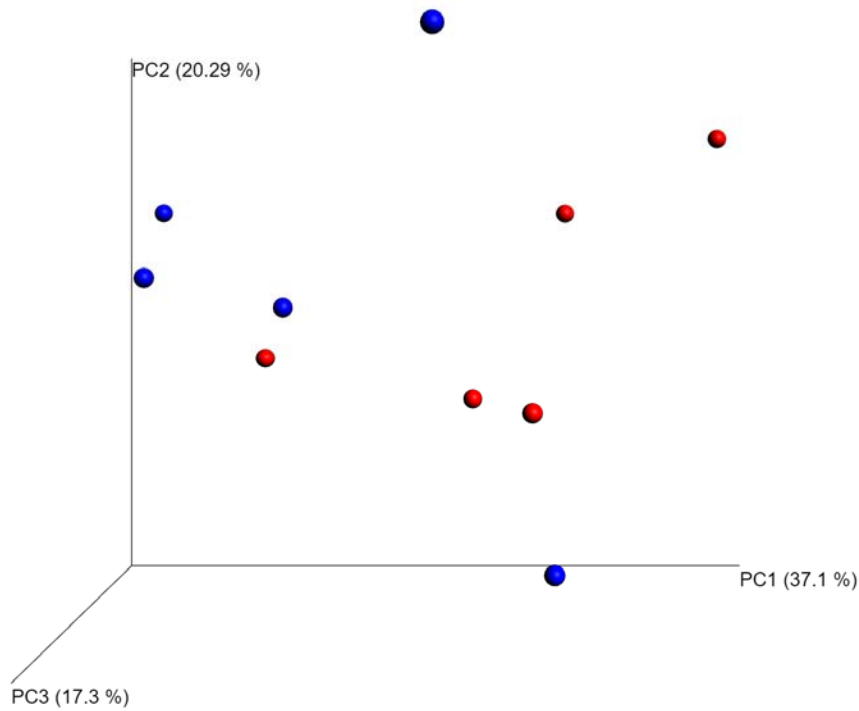

751

752

753 **Figure 9: Beta diversity of the blood microbiome from asthmatic subjects (n =**  
754 **5) and control subjects (n = 5) using weighted UniFrac distance.** Principal  
755 coordinate analysis (PCoA) was performed on OTU tables generated from 16S rRNA  
756 sequencing data from plasma samples collected from asthma subjects (n = 5) and  
757 control subjects (n = 5). Quantitative phylogenetic distances between each of the  
758 samples was measured using a weighed UniFrac distance matrix, and the weighted  
759 UniFrac distances were plotted as a PCoA graph to show beta diversity within  
760 plasma samples from control subjects (n = 5; data plots = blue) and asthma subjects  
761 (n = 5; data plots = red)

762

763

764

## 765 **Concluding Remarks**

766

767 This study aimed to characterise a small yet specific population of HDM-sensitive  
768 adult asthma patients who had developed asthma during childhood. A range of  
769 molecular techniques was applied to characterise gene expression and regulation,  
770 inflammatory protein levels, and nucleic acid evidence of bacteria present in the  
771 blood. This was carried out in an effort to increase our understanding of this  
772 particular asthma phenotype, to begin to explore the molecular mechanisms  
773 responsible, and to identify any candidate biomarkers for further study.

774

775 At the protein level, the asthmatic subjects displayed increased inflammatory protein  
776 levels in the blood compared to the control subjects. This was particularly apparent  
777 for GM-CSF, IFN $\gamma$ , and TARC. The range of inflammatory protein levels within the  
778 asthmatic subjects was noticeably higher than the range observed for the control  
779 subjects. This was explained by the presence of two distinct clusters in the asthmatic  
780 cohort; cluster one was composed of subjects Asthma\_2 and Asthma\_4, and was  
781 characterised by high inflammatory protein levels; and cluster two, composed of  
782 Asthma\_1, Asthma\_3, and Asthma\_5, and characterised by lower levels of  
783 inflammatory proteins. An association between the existence of other atopic  
784 complications, in particular evidence of atopic dermatitis, and IL-17A levels was  
785 unexpectedly observed.

786 Measurement of total IgE concentration within the blood revealed that IgE was  
787 detectable in half of the subjects under investigation (3 control subjects and 2  
788 asthmatic subjects) and was significantly increased in the asthmatic subjects, when  
789 detected. The low detection rate of IgE was not unexpected given its short half-life  
790 (approximately two days) and low concentration levels within the blood (96). IgE was  
791 detected in asthma subjects belonging to the proposed cluster one, and this further  
792 supports the theory of asthmatic subjects forming sub-phenotypes on the basis of  
793 circulatory inflammation. In contrast to IgE, endotoxin levels were decreased in the  
794 asthmatic subjects ( $P$  value = 0.0650), and there appeared to be an inverse  
795 correlation between circulatory endotoxin levels and the reporting of additional atopic  
796 complications. This was a particularly interesting finding as exposure to endotoxin  
797 during early childhood has been previously found to be protective of the  
798 development of childhood asthma (97–100), and we were able to detect changes in  
799 endotoxin levels in our adult cohort.

800

801 Analysis of the diversity of RNA expression within the blood revealed that our  
802 asthmatic donors had more similar RNA profiles to one another than they did to the  
803 control subjects; this was particularly apparent in the miRNA analysis. When  
804 combined with our differential expression analyses, we identified specific mRNA and  
805 miRNA populations within the blood that were distinct between the healthy and  
806 disease states. Interestingly, asthma severity and the use of anti-inflammatory  
807 medication appeared to further influence RNA profiles although we note the

808 limitations of our sample size, and acknowledge the need for a larger sample size to  
809 explore this phenomenon fully. With regards to the unmet need for asthma  
810 biomarkers, we identified various mRNAs in the circulation that were expressed in a  
811 condition-specific manner, including HIST1H3C, PRAM1, RAB6B and CD93. Of  
812 these, elevated levels of soluble CD93 have been previously reported in the serum  
813 of asthmatics during acute asthma exacerbations (101) and in the serum of steroid-  
814 naïve asthmatic patients (102).

815

816 Our microbial characterisation informed by 16S rRNA amplification and sequencing,  
817 revealed increased levels of Firmicutes and decreased levels of Proteobacteria  
818 within the blood of our asthmatic donors. This finding was accompanied by increased  
819 bacterial diversity within the blood of asthmatic subjects, and the identification of  
820 several additional bacterial taxa displaying significantly altered levels dependent on  
821 disease state. The observed decrease in circulating Proteobacteria rRNA in the  
822 asthmatic state is thought to be indicative of reduced Proteobacteria carriage within  
823 the asthmatic subjects at a distant microbiome niche (e.g. the gut, airways and oral  
824 cavity). This may explain the decreased levels of endotoxin (protein) detected in our  
825 asthmatic subjects, given that endotoxin-producing gram-negative bacteria dominate  
826 this phylum. Previous studies have associated childhood asthma and reduced  
827 endotoxin exposure, and it is interesting to note that we detected this same  
828 phenomenon in our adult asthma cohort, many years following childhood.  
829 Furthermore, our asthma patients were found to have increased levels of  
830 Bacteroidetes rRNA, and this appeared to be dependent on medication status with  
831 those patients taking anti-inflammatory medications having lower levels of circulating  
832 Bacteroidetes 16S rRNA than those who were not. As blood circulates the body and  
833 functions as a medium that samples from virtually all body sites (103), it was not  
834 possible to determine herein the microbial niche from which these signals originated.  
835 That said, we hypothesise that changes in the blood are reflective of dysbiosis at  
836 distant site(s) with well-characterised microbial communities (e.g. the gut, oral cavity  
837 and skin), and have significant biomarker potential.

838

839 This study provides a valuable insight into the systemic changes evident in the HDM-  
840 associated asthma, identifies a range of molecules that are present in the circulation  
841 in a condition-specific manner (with clear biomarker potential), and highlights a range  
842 of hypotheses for further study. Moreover, our data also provide an insight into the  
843 level of heterogeneity observed both within the control and asthma samples  
844 investigated, and will be of use for informing sample size calculations for future  
845 studies.

846

847

848

849



850 **Research Affiliations**

851 The National Institute for Health Research Health Protection Research Unit (NIHR  
852 HPRU) in Health Impact of Environmental Hazards at King's College London in  
853 partnership with Public Health England (PHE) in collaboration with Imperial College  
854 London

855

856 **Acknowledgements**

857 This research was part funded by the National Institute for Health Research Health  
858 Protection Research Unit (NIHR HPRU) in Health Impact of Environmental Hazards  
859 at King's College London in partnership with Public Health England. The views  
860 expressed are those of the author(s) and not necessarily those of the NHS, the  
861 NIHR, the Department of Health or Public Health England.

862

863 **Competing Interests Statement**

864

865 I declare that the authors have no competing interests as defined by Nature Research, or  
866 other interests that might be perceived to influence the results and/or discussion reported in  
867 this paper.

868

869 **Author Contributions**

870 DPT, MOL and TWG conceived the original study. DPT developed and refined the molecular  
871 approach used. EW conducted the laboratory work. EW and DPT conducted the data  
872 analysis. EW and DPT interpreted the original data. EW and DPT prepared the original  
873 manuscript. EW, MOL, TWG and DPT reviewed and approved the manuscript.

874

875

876

877



878 **References**

- 879 1. Masoli M, Fabian D, Holt S, Beasley R. The global burden of asthma:  
880 executive summary of the GINA Dissemination Committee Report. *Allergy*  
881 [Internet]. 2004 May 1 [cited 2018 Aug 1];59(5):469–78. Available from:  
882 <http://doi.wiley.com/10.1111/j.1398-9995.2004.00526.x>
- 883 2. Braman SS. The Global Burden of Asthma. *Chest* [Internet]. 2006 Jul 1 [cited  
884 2018 Aug 1];130(1):4S–12S. Available from:  
885 <https://www.sciencedirect.com/science/article/pii/S0012369215329524>
- 886 3. Asher I, Pearce N. Global burden of asthma among children. *Int J Tuberc Lung*  
887 *Dis* [Internet]. 2014 Nov 1 [cited 2018 Aug 1];18(11):1269–78. Available from:  
888 [http://openurl.ingenta.com/content/xref?genre=article&issn=1027-](http://openurl.ingenta.com/content/xref?genre=article&issn=1027-3719&volume=18&issue=11&spage=1269)  
889 [3719&volume=18&issue=11&spage=1269](http://openurl.ingenta.com/content/xref?genre=article&issn=1027-3719&volume=18&issue=11&spage=1269)
- 890 4. Pawankar R. Allergic diseases and asthma: a global public health concern and  
891 a call to action. *World Allergy Organ J* [Internet]. 2014 Dec 19 [cited 2018 Aug  
892 1];7(1):1–3. Available from:  
893 <https://waojournal.biomedcentral.com/articles/10.1186/1939-4551-7-12>
- 894 5. Pawankar R, Canonica G, Holgate S, Lockey R, Blaiss M. WAO White Book  
895 on Allergy 2013 Update WAO White Book on Allergy WAO White Book on  
896 Allergy [Internet]. [cited 2018 Aug 1]. Available from:  
897 <http://www.worldallergy.org/UserFiles/file/WhiteBook2-2013-v8.pdf>
- 898 6. Miranda C, Busacker A, Balzar S, Trudeau J, Wenzel SE. Distinguishing  
899 severe asthma phenotypes: Role of age at onset and eosinophilic  
900 inflammation. *J Allergy Clin Immunol* [Internet]. 2004 Jan 1 [cited 2018 Aug  
901 1];113(1):101–8. Available from:  
902 <https://www.sciencedirect.com/science/article/pii/S0091674903024837>
- 903 7. Holgate ST. Innate and adaptive immune responses in asthma. *Nat Med*  
904 [Internet]. 2012 May 1 [cited 2018 Aug 1];18(5):673–83. Available from:  
905 <http://www.nature.com/articles/nm.2731>
- 906 8. Lucini V, Ciraci R, Dugnani S, Pannacci M, Pisati F, Caronno A, et al.  
907 Antibiotics counteract the worsening of airway remodelling induced by  
908 infections in asthma. *Int J Antimicrob Agents* [Internet]. 2014 May 1 [cited 2018  
909 Aug 1];43(5):442–50. Available from:  
910 <https://www.sciencedirect.com/science/article/pii/S0924857914000600>
- 911 9. Postma DS, Bleecker ER, Amelung PJ, Holroyd KJ, Xu J, Panhuysen CIM, et  
912 al. Genetic Susceptibility to Asthma — Bronchial Hyperresponsiveness  
913 Coinherited with a Major Gene for Atopy. *N Engl J Med* [Internet]. 1995 Oct 5  
914 [cited 2018 Aug 1];333(14):894–900. Available from:  
915 <http://www.nejm.org/doi/abs/10.1056/NEJM199510053331402>
- 916 10. von Hertzen LC. Maternal stress and T-cell differentiation of the developing  
917 immune system: Possible implications for the development of asthma and  
918 atopy. *J Allergy Clin Immunol* [Internet]. 2002 Jun 1 [cited 2018 Aug  
919 1];109(6):923–8. Available from:  
920 <https://www.sciencedirect.com/science/article/pii/S0091674902000040>
- 921 11. Gilmour MI, Jaakkola MS, London SJ, Nel AE, Rogers CA. How exposure to

- 922 environmental tobacco smoke, outdoor air pollutants, and increased pollen  
923 burdens influences the incidence of asthma. *Environ Health Perspect*  
924 [Internet]. 2006 Apr [cited 2018 Aug 1];114(4):627–33. Available from:  
925 <http://www.ncbi.nlm.nih.gov/pubmed/16581557>
- 926 12. Vercelli D. Discovering susceptibility genes for asthma and allergy. *Nat Rev*  
927 *Immunol* [Internet]. 2008 Mar 1 [cited 2018 Aug 1];8(3):169–82. Available from:  
928 <http://www.nature.com/articles/nri2257>
- 929 13. Beasley R, Semprini A, Mitchell EA. Risk factors for asthma: is prevention  
930 possible? *Lancet* [Internet]. 2015 Sep 12 [cited 2018 Aug 1];386(9998):1075–  
931 85. Available from:  
932 <https://www.sciencedirect.com/science/article/pii/S0140673615001567>
- 933 14. Daniels SE, Bhattacharya S, James A, Leaves NI, Young A, Hill MR, et al. A  
934 genome-wide search for quantitative trait loci underlying asthma. *Nature*  
935 [Internet]. 1996 Sep 19 [cited 2018 Aug 1];383(6597):247–50. Available from:  
936 <http://www.nature.com/doi/10.1038/383247a0>
- 937 15. Anderson GP. Endotyping asthma: new insights into key pathogenic  
938 mechanisms in a complex, heterogeneous disease. *Lancet* [Internet]. 2008  
939 Sep 20 [cited 2018 Aug 1];372(9643):1107–19. Available from:  
940 <https://www.sciencedirect.com/science/article/pii/S014067360861452X>
- 941 16. Bateman ED, Hurd SS, Barnes PJ, Bousquet J, Drazen JM, FitzGerald JM, et  
942 al. Global strategy for asthma management and prevention: GINA executive  
943 summary. *Eur Respir J* [Internet]. 2008 Jan 1 [cited 2018 Aug 1];31(1):143–78.  
944 Available from: <http://www.ncbi.nlm.nih.gov/pubmed/18166595>
- 945 17. Edwards MR, Bartlett NW, Hussell T, Openshaw P, Johnston SL. The  
946 microbiology of asthma. *Nat Rev Microbiol* [Internet]. 2012 Jul 6 [cited 2018  
947 Aug 1];10(7):459–71. Available from:  
948 <http://www.nature.com/articles/nrmicro2801>
- 949 18. Wenzel SE. Asthma: defining of the persistent adult phenotypes. *Lancet*  
950 [Internet]. 2006 Aug 26 [cited 2018 Aug 1];368(9537):804–13. Available from:  
951 <https://www.sciencedirect.com/science/article/pii/S0140673606692908>
- 952 19. Lötvall J, Akdis CA, Bacharier LB, Bjermer L, Casale TB, Custovic A, et al.  
953 Asthma endotypes: A new approach to classification of disease entities within  
954 the asthma syndrome. *J Allergy Clin Immunol* [Internet]. 2011 Feb 1 [cited  
955 2018 Aug 1];127(2):355–60. Available from:  
956 <https://www.sciencedirect.com/science/article/pii/S0091674910018580>
- 957 20. Haldar P, Pavord ID, Shaw DE, Berry MA, Thomas M, Brightling CE, et al.  
958 Cluster Analysis and Clinical Asthma Phenotypes. *Am J Respir Crit Care Med*  
959 [Internet]. 2008 Aug 20 [cited 2018 Aug 1];178(3):218–24. Available from:  
960 <http://www.atsjournals.org/doi/abs/10.1164/rccm.200711-1754OC>
- 961 21. Zhang Q, Cox M, Liang Z, Brinkmann F, Cardenas PA, Duff R, et al. Airway  
962 Microbiota in Severe Asthma and Relationship to Asthma Severity and  
963 Phenotypes. Chalmers JD, editor. *PLoS One* [Internet]. 2016 Apr 14 [cited  
964 2018 Aug 1];11(4):e0152724. Available from:  
965 <http://dx.plos.org/10.1371/journal.pone.0152724>

- 966 22. Dahl R. Systemic side effects of inhaled corticosteroids in patients with  
967 asthma. *Respir Med* [Internet]. 2006 Aug 1 [cited 2018 Aug 1];100(8):1307–17.  
968 Available from:  
969 <https://www.sciencedirect.com/science/article/pii/S095461110500510X>
- 970 23. Guilbert TW, Morgan WJ, Zeiger RS, Mauger DT, Boehmer SJ, Szeffler SJ, et  
971 al. Long-Term Inhaled Corticosteroids in Preschool Children at High Risk for  
972 Asthma. *N Engl J Med* [Internet]. 2006 May 11 [cited 2018 Aug  
973 1];354(19):1985–97. Available from:  
974 <http://www.nejm.org/doi/abs/10.1056/NEJMoa051378>
- 975 24. Cumming RG, Mitchell P, Leeder SR. Use of Inhaled Corticosteroids and the  
976 Risk of Cataracts. *N Engl J Med* [Internet]. 1997 Jul 3 [cited 2018 Aug  
977 1];337(1):8–14. Available from:  
978 <http://www.nejm.org/doi/abs/10.1056/NEJM199707033370102>
- 979 25. Wang JJ, Rochtchina E, Tan AG, Cumming RG, Leeder SR, Mitchell P. Use of  
980 Inhaled and Oral Corticosteroids and the Long-term Risk of Cataract.  
981 *Ophthalmology* [Internet]. 2009 Apr 1 [cited 2018 Aug 1];116(4):652–7.  
982 Available from:  
983 <https://www.sciencedirect.com/science/article/pii/S0161642008012542>
- 984 26. Israel E, Banerjee TR, Fitzmaurice GM, Kotlov T V., LaHive K, LeBoff MS.  
985 Effects of Inhaled Glucocorticoids on Bone Density in Premenopausal Women.  
986 *N Engl J Med* [Internet]. 2001 Sep 27 [cited 2018 Aug 1];345(13):941–7.  
987 Available from: <http://www.nejm.org/doi/abs/10.1056/NEJMoa002304>
- 988 27. Staa TP van, Staa TP van, Staa TP van, Leufkens HGM, Cooper C. The  
989 Epidemiology of Corticosteroid-Induced Osteoporosis: a Meta-analysis.  
990 *Osteoporos Int* [Internet]. 2002 Oct 1 [cited 2018 Aug 1];13(10):777–87.  
991 Available from: <http://link.springer.com/10.1007/s001980200108>
- 992 28. Salpeter SR, Ormiston TM, Salpeter EE. Cardiovascular Effects of  $\beta$ -Agonists  
993 in Patients With Asthma and COPD: A Meta-Analysis. *Chest* [Internet]. 2004  
994 Jun 1 [cited 2018 Aug 1];125(6):2309–21. Available from:  
995 <https://www.sciencedirect.com/science/article/pii/S0012369216590102>
- 996 29. Adcock IM, Caramori G, Chung KF. New targets for drug development in  
997 asthma. *Lancet* [Internet]. 2008 Sep 20 [cited 2018 Aug 1];372(9643):1073–87.  
998 Available from:  
999 <https://www.sciencedirect.com/science/article/pii/S014067360861449X>
- 1000 30. Calderón MA, Linneberg A, Kleine-Tebbe J, De Blay F, Hernandez Fernandez  
1001 de Rojas D, Virchow JC, et al. Respiratory allergy caused by house dust mites:  
1002 What do we really know? *J Allergy Clin Immunol* [Internet]. 2015 Jul 1 [cited  
1003 2018 Aug 1];136(1):38–48. Available from:  
1004 <https://www.sciencedirect.com/science/article/pii/S0091674914014821>
- 1005 31. Kocabas CN, Civelek E, Sackesen C, Orhan F, Tuncer A, Adalioglu G, et al.  
1006 Burden of rhinitis in children with asthma. *Pediatr Pulmonol* [Internet]. 2005  
1007 Sep 1 [cited 2018 Aug 1];40(3):235–40. Available from:  
1008 <http://doi.wiley.com/10.1002/ppul.20247>
- 1009 32. Kupczyk M, Kupryś I, Górski P, Kuna P. Aspirin intolerance and allergy to

- 1010 house dust mites: important factors associated with development of severe  
1011 asthma. *Ann Allergy, Asthma Immunol* [Internet]. 2004 Apr 1 [cited 2018 Aug  
1012 1];92(4):453–8. Available from:  
1013 <http://linkinghub.elsevier.com/retrieve/pii/S1081120610617826>
- 1014 33. Virchow JC, Backer V, Kuna P, Prieto L, Nolte H, Villesen HH, et al. Efficacy of  
1015 a House Dust Mite Sublingual Allergen Immunotherapy Tablet in Adults With  
1016 Allergic Asthma. *JAMA* [Internet]. 2016 Apr 26 [cited 2018 Aug  
1017 1];315(16):1715. Available from:  
1018 <http://jama.jamanetwork.com/article.aspx?doi=10.1001/jama.2016.3964>
- 1019 34. Trapnell C, Roberts A, Goff L, Pertea G, Kim D, Kelley DR, et al. Differential  
1020 gene and transcript expression analysis of RNA-seq experiments with TopHat  
1021 and Cufflinks. *Nat Protoc* [Internet]. 2012 Mar 1 [cited 2018 Aug 1];7(3):562–  
1022 78. Available from: <http://www.ncbi.nlm.nih.gov/pubmed/22383036>
- 1023 35. Rueda A, Barturen G, Lebrón R, Gómez-Martín C, Alganza Á, Oliver JL, et al.  
1024 sRNAtoolbox: an integrated collection of small RNA research tools. *Nucleic  
1025 Acids Res* [Internet]. 2015 Jul 1 [cited 2018 Oct 7];43(W1):W467-73. Available  
1026 from: <http://www.ncbi.nlm.nih.gov/pubmed/26019179>
- 1027 36. Robinson MD, McCarthy DJ, Smyth GK. edgeR: a Bioconductor package for  
1028 differential expression analysis of digital gene expression data. *Bioinformatics*  
1029 [Internet]. 2010 Jan 1 [cited 2018 Oct 7];26(1):139–40. Available from:  
1030 [https://academic.oup.com/bioinformatics/article-  
1031 lookup/doi/10.1093/bioinformatics/btp616](https://academic.oup.com/bioinformatics/article-lookup/doi/10.1093/bioinformatics/btp616)
- 1032 37. Krämer A, Green J, Pollard J, Tugendreich S. Causal analysis approaches in  
1033 Ingenuity Pathway Analysis. *Bioinformatics* [Internet]. 2014 Feb 15 [cited 2018  
1034 Aug 29];30(4):523–30. Available from:  
1035 [https://academic.oup.com/bioinformatics/article-  
1036 lookup/doi/10.1093/bioinformatics/btt703](https://academic.oup.com/bioinformatics/article-lookup/doi/10.1093/bioinformatics/btt703)
- 1037 38. Whittle E, Leonard MO, Harrison RD, Gant TW, Tonge DP. Multi-Method  
1038 Characterisation of the Human Circulating Microbiome. *bioRxiv* [Internet]. 2018  
1039 Jul 2 [cited 2018 Oct 10];359760. Available from:  
1040 <https://www.biorxiv.org/content/early/2018/07/02/359760>
- 1041 39. Juniper EF, O'byrne PM, Guyatt G., Ferrie P., King D. Development and  
1042 validation of a questionnaire to measure asthma control. *Eur Respir J*  
1043 [Internet]. 1999 Oct 1 [cited 2018 Aug 1];14(4):902. Available from:  
1044 <http://erj.ersjournals.com/content/14/4/902>
- 1045 40. Juniper EF, Gruffydd-Jones K, Ward S, Svensson K. Asthma Control  
1046 Questionnaire in children: validation, measurement properties, interpretation.  
1047 *Eur Respir J* [Internet]. 2010 Dec 7 [cited 2018 Aug 1];36(6):1410–6. Available  
1048 from: <http://www.ncbi.nlm.nih.gov/pubmed/20530041>
- 1049 41. Liu J, Liu Y, Wang D, He M, Diao L, Liu Z, et al. AllerGAtlas 1.0: a human  
1050 allergy-related genes database. *Database* [Internet]. 2018 Jan 1 [cited 2018  
1051 Sep 24];2018. Available from:  
1052 [https://academic.oup.com/database/article/doi/10.1093/database/bay010/4904  
1053 120](https://academic.oup.com/database/article/doi/10.1093/database/bay010/4904)

- 1054 42. Kemper C, Chan AC, Green JM, Brett KA, Murphy KM, Atkinson JP. Activation  
1055 of human CD4+ cells with CD3 and CD46 induces a T-regulatory cell 1  
1056 phenotype. *Nature* [Internet]. 2003 Jan 23 [cited 2018 Oct 1];421(6921):388–  
1057 92. Available from: <http://www.nature.com/doi/10.1038/nature01315>
- 1058 43. Xu Y-Q, Gao Y-D, Yang J, Guo W. A defect of CD4+CD25+ regulatory T cells  
1059 in inducing interleukin-10 production from CD4+ T cells under CD46  
1060 costimulation in asthma patients. *J Asthma* [Internet]. 2010 May 9 [cited 2018  
1061 Oct 1];47(4):367–73. Available from:  
1062 <http://www.ncbi.nlm.nih.gov/pubmed/20528588>
- 1063 44. Cardone J, Le Fric G, Vantourout P, Roberts A, Fuchs A, Jackson I, et al.  
1064 Complement regulator CD46 temporally regulates cytokine production by  
1065 conventional and unconventional T cells. *Nat Immunol* [Internet]. 2010 Sep 8  
1066 [cited 2018 Oct 2];11(9):862–71. Available from:  
1067 <http://www.nature.com/articles/ni.1917>
- 1068 45. Le Fric G, Sheppard D, Whiteman P, Karsten CM, Shamoun SA-T, Laing A,  
1069 et al. The CD46-Jagged1 interaction is critical for human TH1 immunity. *Nat*  
1070 *Immunol* [Internet]. 2012 Dec 21 [cited 2018 Oct 2];13(12):1213–21. Available  
1071 from: <http://www.nature.com/articles/ni.2454>
- 1072 46. Tsai Y-G, Niu D-M, Yang KD, Hung C-H, Yeh Y-J, Lee C-Y, et al. Functional  
1073 defects of CD46-induced regulatory T cells to suppress airway inflammation in  
1074 mite allergic asthma. *Lab Invest* [Internet]. 2012 Sep 2 [cited 2018 Oct  
1075 1];92(9):1260–9. Available from:  
1076 <http://www.nature.com/articles/labinvest201286>
- 1077 47. Simonetta F, Chiali A, Cordier C, Urrutia A, Girault I, Bloquet S, et al.  
1078 Increased CD127 expression on activated FOXP3<sup>+</sup> CD4<sup>+</sup> regulatory T cells.  
1079 [cited 2018 Oct 1]; Available from: [www.eji-journal.eu](http://www.eji-journal.eu)
- 1080 48. Kelly EAB, Koziol-White CJ, Clay KJ, Liu LY, Bates ME, Bertics PJ, et al.  
1081 Potential contribution of IL-7 to allergen-induced eosinophilic airway  
1082 inflammation in asthma. *J Immunol* [Internet]. 2009 Feb 1 [cited 2018 Oct  
1083 1];182(3):1404–10. Available from:  
1084 <http://www.ncbi.nlm.nih.gov/pubmed/19155487>
- 1085 49. del Pozo V, Rojo M, Rubio ML, Cortegano I, Cárdbaba B, Gallardo S, et al.  
1086 Gene Therapy with Galectin-3 Inhibits Bronchial Obstruction and Inflammation  
1087 in Antigen-challenged Rats through Interleukin-5 Gene Downregulation. *Am J*  
1088 *Respir Crit Care Med* [Internet]. 2002 Sep 20 [cited 2018 Oct 1];166(5):732–7.  
1089 Available from: <http://www.atsjournals.org/doi/abs/10.1164/rccm.2111031>
- 1090 50. Fermin Lee A, Chen H-Y, Wan L, Wu S-Y, Yu J-S, Huang AC, et al. Galectin-3  
1091 Modulates Th17 Responses by Regulating Dendritic Cell Cytokines. *Am J*  
1092 *Pathol* [Internet]. 2013 Oct 1 [cited 2018 Oct 1];183(4):1209–22. Available  
1093 from: <https://www.sciencedirect.com/science/article/pii/S0002944013004732>
- 1094 51. Zhang R, Brennan ML, Shen Z, Macpherson JC, Schmitt D, Molenda C, et al.  
1095 Myeloperoxidase Functions as a Major Enzymatic Catalyst for Initiation of Lipid  
1096 Peroxidation at Sites of Inflammation Downloaded from [Internet]. Vol. 1. *JBC*  
1097 *Papers in Press*; 2002 [cited 2018 Oct 1]. Available from:  
1098 <http://www.jbc.org/content/early/2002/09/30/jbc.M209124200.full.pdf>



- 1099 52. Carraway R, Cochrane DE, Lansman JB, Leeman SE, Paterson BM, Welch  
1100 HJ. Neurotensin stimulates exocytotic histamine secretion from rat mast cells  
1101 and elevates plasma histamine levels. *J Physiol* [Internet]. 1982 Feb 1 [cited  
1102 2018 Oct 1];323(1):403–14. Available from:  
1103 <http://doi.wiley.com/10.1113/jphysiol.1982.sp014080>
- 1104 53. Singh LK, Pang X, Alexacos N, Letourneau R, Theoharides TC. Acute  
1105 Immobilization Stress Triggers Skin Mast Cell Degranulation via Corticotropin  
1106 Releasing Hormone, Neurotensin, and Substance P: A Link to Neurogenic  
1107 Skin Disorders. *Brain Behav Immun* [Internet]. 1999 Sep 1 [cited 2018 Oct  
1108 1];13(3):225–39. Available from:  
1109 <https://www.sciencedirect.com/science/article/pii/S0889159198905414>
- 1110 54. Hatzelmann A, Schudt C. Anti-Inflammatory and Immunomodulatory Potential  
1111 of the Novel PDE4 Inhibitor Roflumilast in Vitro [Internet]. 2001 [cited 2018 Oct  
1112 2]. Available from: <http://jpet.aspetjournals.org>
- 1113 55. Tang H-F, Song Y-H, Chen J-C, Chen J-Q, Wang P. Upregulation of  
1114 Phosphodiesterase-4 in the Lung of Allergic Rats. *Am J Respir Crit Care Med*  
1115 [Internet]. 2005 Apr 15 [cited 2018 Oct 2];171(8):823–8. Available from:  
1116 <http://www.ncbi.nlm.nih.gov/pubmed/15665325>
- 1117 56. Sun J, Deng Y, Wu X, Tang H, Deng J, Chen J, et al. Inhibition of  
1118 phosphodiesterase activity, airway inflammation and hyperresponsiveness by  
1119 PDE4 inhibitor and glucocorticoid in a murine model of allergic asthma. *Life Sci*  
1120 [Internet]. 2006 Oct 26 [cited 2018 Oct 2];79(22):2077–85. Available from:  
1121 <https://www.sciencedirect.com/science/article/pii/S0024320506005236>
- 1122 57. Wyllie DH, Kiss-Toth E, Visintin A, Smith SC, Boussouf S, Segal DM, et al.  
1123 Evidence for an accessory protein function for Toll-like receptor 1 in anti-  
1124 bacterial responses. *J Immunol* [Internet]. 2000 Dec 15 [cited 2018 Oct  
1125 2];165(12):7125–32. Available from:  
1126 <http://www.ncbi.nlm.nih.gov/pubmed/11120843>
- 1127 58. Takeuchi O, Sato S, Horiuchi T, Hoshino K, Takeda K, Dong Z, et al. Cutting  
1128 edge: role of Toll-like receptor 1 in mediating immune response to microbial  
1129 lipoproteins. *J Immunol* [Internet]. 2002 Jul 1 [cited 2018 Oct 2];169(1):10–4.  
1130 Available from: <http://www.ncbi.nlm.nih.gov/pubmed/12077222>
- 1131 59. Liu PT, Stenger S, Li H, Wenzel L, Tan BH, Krutzik SR, et al. Toll-like receptor  
1132 triggering of a vitamin D-mediated human antimicrobial response. *Science*  
1133 [Internet]. 2006 Mar 24 [cited 2018 Oct 2];311(5768):1770–3. Available from:  
1134 <http://www.ncbi.nlm.nih.gov/pubmed/16497887>
- 1135 60. Wittke A, Weaver V, Mahon BD, August A, Cantorna MT. Vitamin D receptor-  
1136 deficient mice fail to develop experimental allergic asthma. *J Immunol*  
1137 [Internet]. 2004 Sep 1 [cited 2018 Oct 1];173(5):3432–6. Available from:  
1138 <http://www.ncbi.nlm.nih.gov/pubmed/15322208>
- 1139 61. Hartmann B, Heine G, Babina M, Steinmeyer A, Zügel U, Radbruch A, et al.  
1140 Targeting the vitamin D receptor inhibits the B cell-dependent allergic immune  
1141 response. *Allergy* [Internet]. 2011 Apr 1 [cited 2018 Oct 1];66(4):540–8.  
1142 Available from: <http://doi.wiley.com/10.1111/j.1398-9995.2010.02513.x>

- 1143 62. Levings MK, Sangregorio R, Roncarolo MG. Human cd25(+)cd4(+) t regulatory  
1144 cells suppress naive and memory T cell proliferation and can be expanded in  
1145 vitro without loss of function. *J Exp Med* [Internet]. 2001 Jun 4 [cited 2018 Oct  
1146 7];193(11):1295–302. Available from:  
1147 <http://www.ncbi.nlm.nih.gov/pubmed/11390436>
- 1148 63. Roncarolo MG, Bacchetta R, Bordignon C, Narula S, Levings MK. Type 1 T  
1149 regulatory cells. *Immunol Rev* [Internet]. 2001 Aug 1 [cited 2018 Oct  
1150 7];182(1):68–79. Available from: <http://doi.wiley.com/10.1034/j.1600-065X.2001.1820105.x>
- 1152 64. Sakaguchi S, Yamaguchi T, Nomura T, Ono M. Regulatory T Cells and  
1153 Immune Tolerance. *Cell* [Internet]. 2008 May 30 [cited 2018 Oct  
1154 7];133(5):775–87. Available from:  
1155 <https://www.sciencedirect.com/science/article/pii/S0092867408006247>
- 1156 65. Shevach EM. Mechanisms of Foxp3+ T Regulatory Cell-Mediated  
1157 Suppression. *Immunity* [Internet]. 2009 May 22 [cited 2018 Oct 7];30(5):636–  
1158 45. Available from:  
1159 <https://www.sciencedirect.com/science/article/pii/S1074761309001976>
- 1160 66. Muñoz-Culla M, Irizar H, Castillo-Triviño T, Sáenz-Cuesta M, Sepúlveda L,  
1161 Lopetegi I, et al. Blood miRNA expression pattern is a possible risk marker for  
1162 natalizumab-associated progressive multifocal leukoencephalopathy in  
1163 multiple sclerosis patients. *Mult Scler J* [Internet]. 2014 Dec 22 [cited 2018 Aug  
1164 31];20(14):1851–9. Available from:  
1165 <http://journals.sagepub.com/doi/10.1177/1352458514534513>
- 1166 67. Nielsen S, Åkerström T, Rinnov A, Yfanti C, Scheele C, Pedersen BK, et al.  
1167 The miRNA Plasma Signature in Response to Acute Aerobic Exercise and  
1168 Endurance Training. Eckel J, editor. *PLoS One* [Internet]. 2014 Feb 19 [cited  
1169 2018 Aug 31];9(2):e87308. Available from:  
1170 <http://dx.plos.org/10.1371/journal.pone.0087308>
- 1171 68. Pirola CJ, Fernández Gianotti T, Castaño GO, Mallardi P, San Martino J, Mora  
1172 Gonzalez Lopez Ledesma M, et al. Circulating microRNA signature in non-  
1173 alcoholic fatty liver disease: from serum non-coding RNAs to liver histology  
1174 and disease pathogenesis. *Gut* [Internet]. 2015 May [cited 2018 Aug  
1175 31];64(5):800–12. Available from:  
1176 <http://www.ncbi.nlm.nih.gov/pubmed/24973316>
- 1177 69. Panganiban RP, Wang Y, Howrylak J, Chinchilli VM, Craig TJ, August A, et al.  
1178 Circulating microRNAs as biomarkers in patients with allergic rhinitis and  
1179 asthma. *J Allergy Clin Immunol* [Internet]. 2016 May [cited 2018 Aug  
1180 29];137(5):1423–32. Available from:  
1181 <http://linkinghub.elsevier.com/retrieve/pii/S0091674916003006>
- 1182 70. Tonge DP, Gant TW. What is normal? Next generation sequencing-driven  
1183 analysis of the human circulating miRNAome. *BMC Mol Biol* [Internet]. 2016  
1184 Dec 9 [cited 2018 Oct 10];17(1):4. Available from:  
1185 <http://www.biomedcentral.com/1471-2199/17/4>
- 1186 71. Zhu J, Jankovic D, Grinberg A, Guo L, Paul WE. Gfi-1 plays an important role  
1187 in IL-2-mediated Th2 cell expansion [Internet]. [cited 2018 Aug 29]. Available

- 1188 from: [www.pnas.org/cgi/doi/10.1073/pnas.0608981103](http://www.pnas.org/cgi/doi/10.1073/pnas.0608981103)
- 1189 72. Kuwahara M, Yamashita M, Shinoda K, Tofukuji S, Onodera A, Shinnakasu R,  
1190 et al. The transcription factor Sox4 is a downstream target of signaling by the  
1191 cytokine TGF- $\beta$  and suppresses TH2 differentiation. *Nat Immunol* [Internet].  
1192 2012 Aug 1 [cited 2018 Aug 29];13(8):778–86. Available from:  
1193 <http://www.nature.com/articles/ni.2362>
- 1194 73. Spooner CJ, Lesch J, Yan D, Khan AA, Abbas A, Ramirez-Carrozzi V, et al.  
1195 Specification of type 2 innate lymphocytes by the transcriptional determinant  
1196 Gfi1. *Nat Immunol* [Internet]. 2013 Dec 20 [cited 2018 Aug 30];14(12):1229–  
1197 36. Available from: <http://www.nature.com/articles/ni.2743>
- 1198 74. Chang Y-J, Kim HY, Albacker LA, Baumgarth N, McKenzie ANJ, Smith DE, et  
1199 al. Innate lymphoid cells mediate influenza-induced airway hyper-reactivity  
1200 independently of adaptive immunity. *Nat Immunol* [Internet]. 2011 Jul 29 [cited  
1201 2018 Aug 30];12(7):631–8. Available from:  
1202 <http://www.nature.com/articles/ni.2045>
- 1203 75. Halim TYF, Krauß RH, Sun AC, Takei F. Lung Natural Helper Cells Are a  
1204 Critical Source of Th2 Cell-Type Cytokines in Protease Allergen-Induced  
1205 Airway Inflammation. *Immunity* [Internet]. 2012 Mar 23 [cited 2018 Aug  
1206 30];36(3):451–63. Available from:  
1207 <https://www.sciencedirect.com/science/article/pii/S1074761312000854>
- 1208 76. Zhu J. T helper 2 (Th2) cell differentiation, type 2 innate lymphoid cell (ILC2)  
1209 development and regulation of interleukin-4 (IL-4) and IL-13 production.  
1210 *Cytokine* [Internet]. 2015 Sep 1 [cited 2018 Aug 30];75(1):14–24. Available  
1211 from: <https://www.sciencedirect.com/science/article/pii/S1043466615001908>
- 1212 77. Shen T-C, Lin C-L, Wei C-C, Tu C-Y, Li Y-F. The risk of asthma in rheumatoid  
1213 arthritis: a population-based cohort study. *QJM* [Internet]. 2014 Jun 1 [cited  
1214 2018 Aug 30];107(6):435–42. Available from:  
1215 <https://academic.oup.com/qjmed/article-lookup/doi/10.1093/qjmed/hcu008>
- 1216 78. Seiskari T, Viskari H, Kondrashova A, Haapala A-M, Ilonen J, Knip M, et al.  
1217 Co-occurrence of allergic sensitization and type 1 diabetes. *Ann Med*  
1218 [Internet]. 2010 Jul 13 [cited 2018 Aug 30];42(5):352–9. Available from:  
1219 <http://www.ncbi.nlm.nih.gov/pubmed/20465355>
- 1220 79. Biron CA, Nguyen KB, Pien GC, Cousens LP, Salazar-Mather TP. NATURAL  
1221 KILLER CELLS IN ANTIVIRAL DEFENSE: Function and Regulation by Innate  
1222 Cytokines. *Annu Rev Immunol* [Internet]. 1999 Apr 28 [cited 2018 Sep  
1223 2];17(1):189–220. Available from:  
1224 <http://www.annualreviews.org/doi/10.1146/annurev.immunol.17.1.189>
- 1225 80. French AR, Yokoyama WM. Natural killer cells and viral infections. *Curr Opin*  
1226 *Immunol* [Internet]. 2003 Feb 1 [cited 2018 Sep 2];15(1):45–51. Available from:  
1227 <https://www.sciencedirect.com/science/article/pii/S095279150200002X>
- 1228 81. Tupin E, Kinjo Y, Kronenberg M. The unique role of natural killer T cells in the  
1229 response to microorganisms. *Nat Rev Microbiol* [Internet]. 2007 Jun 8 [cited  
1230 2018 Sep 2];5(6):405–17. Available from:  
1231 <http://www.nature.com/articles/nrmicro1657>



- 1232 82. Vivier E, Tomasello E, Baratin M, Walzer T, Ugolini S. Functions of natural  
1233 killer cells. 2008 [cited 2018 Sep 2]; Available from:  
1234 <http://www.nature.com/natureimmunology>
- 1235 83. Nicholson KG, Kent J, Ireland DC. Respiratory viruses and exacerbations of  
1236 asthma in adults. *BMJ* [Internet]. 1993 Oct 16 [cited 2018 Sep  
1237 2];307(6910):982–6. Available from:  
1238 <http://www.ncbi.nlm.nih.gov/pubmed/8241910>
- 1239 84. Johnston SL, Pattemore PK, Sanderson G, Smith S, Lampe F, Josephs L, et  
1240 al. Community study of role of viral infections in exacerbations of asthma in 9-  
1241 11 year old children. *BMJ* [Internet]. 1995 May 13 [cited 2018 Sep  
1242 2];310(6989):1225–9. Available from:  
1243 <http://www.ncbi.nlm.nih.gov/pubmed/7767192>
- 1244 85. Murray CS, Poletti G, Keadze T, Morris J, Woodcock A, Johnston SL, et al.  
1245 Study of modifiable risk factors for asthma exacerbations: virus infection and  
1246 allergen exposure increase the risk of asthma hospital admissions in children.  
1247 *Thorax* [Internet]. 2006 May 1 [cited 2018 Sep 2];61(5):376–82. Available from:  
1248 <http://www.ncbi.nlm.nih.gov/pubmed/16384881>
- 1249 86. Busse WW, Lemanske RF, Gern JE. Role of viral respiratory infections in  
1250 asthma and asthma exacerbations. *Lancet* [Internet]. 2010 Sep 4 [cited 2018  
1251 Sep 2];376(9743):826–34. Available from:  
1252 <https://www.sciencedirect.com/science/article/pii/S0140673610613803>
- 1253 87. Papadopoulos NG, Stanciu LA, Papi A, Holgate ST, Johnston SL. A defective  
1254 type 1 response to rhinovirus in atopic asthma. *Thorax* [Internet]. 2002 Apr 1  
1255 [cited 2018 Sep 2];57(4):328–32. Available from:  
1256 <http://www.ncbi.nlm.nih.gov/pubmed/11923551>
- 1257 88. Wark PAB, Johnston SL, Bucchieri F, Powell R, Puddicombe S, Laza-Stanca  
1258 V, et al. Asthmatic bronchial epithelial cells have a deficient innate immune  
1259 response to infection with rhinovirus. *J Exp Med* [Internet]. 2005 Mar 21 [cited  
1260 2018 Sep 2];201(6):937–47. Available from:  
1261 <http://www.ncbi.nlm.nih.gov/pubmed/15781584>
- 1262 89. Sykes A, Edwards MR, Macintyre J, del Rosario A, Bakhsoliani E, Trujillo-  
1263 Torralbo M-B, et al. Rhinovirus 16–induced IFN- $\alpha$  and IFN- $\beta$  are deficient in  
1264 bronchoalveolar lavage cells in asthmatic patients. *J Allergy Clin Immunol*  
1265 [Internet]. 2012 Jun 1 [cited 2018 Sep 2];129(6):1506–1514.e6. Available from:  
1266 <https://www.sciencedirect.com/science/article/pii/S0091674912006173>
- 1267 90. Openshaw PJ, Hussell T. Intracellular IFN-gamma expression in natural killer  
1268 cells precedes lung CD8+ T cell recruitment during respiratory syncytial virus  
1269 infection. *J Gen Virol* [Internet]. 1998 Nov 1 [cited 2018 Sep 2];79(11):2593–  
1270 601. Available from:  
1271 [http://jgv.microbiologyresearch.org/content/journal/jgv/10.1099/0022-1317-79-  
1272 11-2593](http://jgv.microbiologyresearch.org/content/journal/jgv/10.1099/0022-1317-79-11-2593)
- 1273 91. Sears MR, Greene JM, Willan AR, Taylor DR, Flannery EM, Cowan JO, et al.  
1274 Long-term relation between breastfeeding and development of atopy and  
1275 asthma in children and young adults: a longitudinal study. *Lancet* [Internet].  
1276 2002 Sep 21 [cited 2018 Sep 7];360(9337):901–7. Available from:

- 1277 <https://www.sciencedirect.com/science/article/pii/S0140673602110257>
- 1278 92. Davis MF, Peng RD, McCormack MC, Matsui EC. Staphylococcus aureus  
1279 colonization is associated with wheeze and asthma among US children and  
1280 young adults. *J Allergy Clin Immunol* [Internet]. 2015 Mar 1 [cited 2018 Sep  
1281 7];135(3):811–3.e5. Available from:  
1282 <http://www.ncbi.nlm.nih.gov/pubmed/25533526>
- 1283 93. Bisgaard H, Hermansen MN, Buchvald F, Loland L, Halkjaer LB, Bønnelykke  
1284 K, et al. Childhood Asthma after Bacterial Colonization of the Airway in  
1285 Neonates. *N Engl J Med* [Internet]. 2007 Oct 11 [cited 2018 Sep  
1286 7];357(15):1487–95. Available from:  
1287 <http://www.nejm.org/doi/abs/10.1056/NEJMoa052632>
- 1288 94. Teo SM, Mok D, Pham K, Kusel M, Serralha M, Troy N, et al. The Infant  
1289 Nasopharyngeal Microbiome Impacts Severity of Lower Respiratory Infection  
1290 and Risk of Asthma Development. *Cell Host Microbe* [Internet]. 2015 May 13  
1291 [cited 2018 Sep 7];17(5):704–15. Available from:  
1292 <https://www.sciencedirect.com/science/article/pii/S1931312815001250>
- 1293 95. Park H, Shin JW, Park S-G, Kim W. Microbial Communities in the Upper  
1294 Respiratory Tract of Patients with Asthma and Chronic Obstructive Pulmonary  
1295 Disease. Chu HW, editor. *PLoS One* [Internet]. 2014 Oct 16 [cited 2018 Aug  
1296 31];9(10):e109710. Available from:  
1297 <http://dx.plos.org/10.1371/journal.pone.0109710>
- 1298 96. Stone KD, Prussin C, Metcalfe DD. IgE, mast cells, basophils, and eosinophils.  
1299 *J Allergy Clin Immunol* [Internet]. 2010 Feb 1 [cited 2018 Sep 3];125(2):S73–  
1300 80. Available from:  
1301 <https://www.sciencedirect.com/science/article/pii/S0091674909017345>
- 1302 97. Gereda J, Leung D, Thatayatikom A, Streib J, Price M, Klinnert M, et al.  
1303 Relation between house-dust endotoxin exposure, type 1 T-cell development,  
1304 and allergen sensitisation in infants at high risk of asthma. *Lancet* [Internet].  
1305 2000 May 13 [cited 2018 Sep 3];355(9216):1680–3. Available from:  
1306 <https://www.sciencedirect.com/science/article/pii/S014067360002239X>
- 1307 98. Douwes J, van Strien R, Doekes G, Smit J, Kerkhof M, Gerritsen J, et al. Does  
1308 early indoor microbial exposure reduce the risk of asthma? The Prevention  
1309 and Incidence of Asthma and Mite Allergy birth cohort study. *J Allergy Clin  
1310 Immunol* [Internet]. 2006 May 1 [cited 2018 Sep 3];117(5):1067–73. Available  
1311 from: <https://www.sciencedirect.com/science/article/pii/S0091674906003113>
- 1312 99. Gehring U, Strikwold M, Schram-Bijkerk D, Weinmayr G, Genuneit J, Nagel G,  
1313 et al. Asthma and allergic symptoms in relation to house dust endotoxin:  
1314 Phase Two of the International Study on Asthma and Allergies in Childhood  
1315 (ISAAC II). *Clin Exp Allergy* [Internet]. 2008 Dec 1 [cited 2018 Sep  
1316 3];38(12):1911–20. Available from: [http://doi.wiley.com/10.1111/j.1365-  
1317 2222.2008.03087.x](http://doi.wiley.com/10.1111/j.1365-2222.2008.03087.x)
- 1318 100. Tischer C, Gehring U, Chen C-M, Kerkhof M, Koppelman G, Sausenthaler S,  
1319 et al. Respiratory health in children, and indoor exposure to (1,3)- $\beta$ -D-glucan,  
1320 EPS mould components and endotoxin. *Eur Respir J* [Internet]. 2011 May 3  
1321 [cited 2018 Sep 3];37(5):1050–9. Available from:

- 1322 <http://www.ncbi.nlm.nih.gov/pubmed/20817706>
- 1323 101. Sigari N, Jalili A, Mahdawi L, Ghaderi E, Shilan M. Soluble CD93 as a Novel  
1324 Biomarker in Asthma Exacerbation. *Allergy Asthma Immunol Res* [Internet].  
1325 2016 Sep 1 [cited 2018 Sep 2];8(5):461. Available from:  
1326 <https://synapse.koreamed.org/DOIx.php?id=10.4168/aair.2016.8.5.461>
- 1327 102. Park HJ, Han H, Lee SC, Son YW, Sim DW, Park KH, et al. Soluble CD93 in  
1328 Serum as a Marker of Allergic Inflammation. *Yonsei Med J* [Internet]. 2017  
1329 May 1 [cited 2018 Sep 2];58(3):598. Available from:  
1330 <https://synapse.koreamed.org/DOIx.php?id=10.3349/ymj.2017.58.3.598>
- 1331 103. Kowarsky M, Camunas-Soler J, Kertesz M, De Vlaminck I, Koh W, Pan W, et  
1332 al. Numerous uncharacterized and highly divergent microbes which colonize  
1333 humans are revealed by circulating cell-free DNA. *Proc Natl Acad Sci U S A*  
1334 [Internet]. 2017 Sep 5 [cited 2018 Oct 10];114(36):9623–8. Available from:  
1335 <http://www.ncbi.nlm.nih.gov/pubmed/28830999>
- 1336
- 1337
